# Supplementary material for: Overcoming the barrier: designing novel thermally robust shape memory vitrimers by establishing a new machine learning framework
Source: Royal Society of Chemistry journal article supplement (doi:10.1039/d3cp03631f), 2023-01-01
Supplement: d3cp03631f1.xlsx [file d3cp03631f1.xlsx]

## Sheet: Sheet1
Temperature	Storage modulus (Mpa)	Tan delta
-29.9122	5134.28	0.06061
-29.8902	5136.02	0.06085
-29.8666	5137.43	0.06089
-29.8159	5139.42	0.06095
-29.7951	5139.26	0.06076
-29.7137	5139.87	0.06047
-29.6699	5140.69	0.06045
-29.5985	5141.81	0.0607
-29.5448	5142.11	0.06035
-29.4672	5142.93	0.06034
-29.4036	5143.67	0.06068
-29.3061	5144.16	0.06044
-29.2388	5144.44	0.06022
-29.1223	5145.88	0.06015
-29.0413	5145.66	0.06007
-28.9399	5146.68	0.06012
-28.8207	5148.3	0.06048
-28.7431	5148.03	0.06031
-28.6209	5148.77	0.06
-28.5176	5150.15	0.06013
-28.4003	5150.04	0.06028
-28.2882	5150.38	0.0603
-28.16	5150.71	0.0602
-28.0438	5151.04	0.06015
-27.9193	5151.51	0.06038
-27.8053	5150.93	0.06003
-27.6885	5151.99	0.06012
-27.577	5152.2	0.06002
-27.4491	5152.8	0.06009
-27.3206	5151.8	0.05991
-27.1935	5152.67	0.06013
-27.0764	5152.5	0.05996
-26.946	5151.97	0.05976
-26.826	5152.21	0.05994
-26.6797	5152.08	0.05997
-26.5409	5152.38	0.05992
-26.4084	5152.43	0.05976
-26.283	5153.05	0.06
-26.1303	5152.16	0.05994
-25.999	5152.22	0.05986
-25.8676	5153.02	0.05997
-25.7101	5152.5	0.06007
-25.6157	5152.33	0.05987
-25.4446	5152.03	0.05996
-25.3319	5151.66	0.06019
-25.1833	5150.85	0.06006
-25.0518	5149.86	0.05975
-24.9095	5149.28	0.05978
-24.736	5149.02	0.05987
-24.5741	5148.53	0.05984
-24.5075	5148.4	0.05989
-24.3269	5147.89	0.05987
-24.1837	5147.47	0.05987
-24.0722	5147.27	0.05977
-23.9502	5146.88	0.05973
-23.8233	5146.92	0.06
-23.6562	5146.01	0.05992
-23.4992	5145.6	0.05995
-23.3526	5144.54	0.05983
-23.1908	5143.65	0.0596
-23.0547	5142.82	0.05968
-23.0089	5141.72	0.0598
-22.8415	5140.96	0.05979
-22.7304	5140.23	0.05974
-22.6149	5139.06	0.05971
-22.4648	5137.89	0.05968
-22.3786	5136.94	0.05964
-22.2094	5135.68	0.05984
-22.094	5133.61	0.05964
-21.9768	5131.82	0.05961
-21.8421	5129.55	0.05965
-21.7213	5126.93	0.05964
-21.5789	5124.27	0.0596
-21.4339	5121.54	0.05948
-21.3384	5119.01	0.05955
-21.1969	5116.24	0.05963
-20.9983	5113.34	0.0596
-20.8684	5109.91	0.05941
-20.7434	5107.39	0.05952
-20.5609	5103.62	0.05932
-20.3806	5100.06	0.05912
-20.157	5096.7	0.05921
-20.1397	5092.99	0.05899
-19.8189	5089.88	0.05925
-19.6563	5086.7	0.05921
-19.4997	5082.97	0.05912
-19.3227	5079.96	0.05914
-19.1991	5077.52	0.05905
-18.9621	5075.25	0.05873
-18.8518	5074.04	0.05889
-18.7162	5072.83	0.05888
-18.4888	5071.24	0.05857
-18.3578	5071.28	0.05868
-18.2702	5071.59	0.05897
-18.0744	5071.69	0.05884
-17.9398	5071.48	0.05866
-17.7695	5071.47	0.05871
-17.5963	5072.24	0.05874
-17.5875	5072.52	0.05866
-17.3095	5073.66	0.05898
-17.188	5074.93	0.05908
-16.8842	5075.17	0.05895
-16.8389	5075.57	0.05887
-16.6593	5075.72	0.05877
-16.5272	5076.21	0.05875
-16.4462	5076.76	0.05906
-16.1061	5077.25	0.05906
-16.0909	5077.14	0.05916
-15.8171	5076.48	0.05918
-15.6564	5074.67	0.059
-15.5723	5074.78	0.05935
-15.4381	5072.83	0.05957
-15.2343	5069.89	0.05934
-15.2039	5067.57	0.05903
-14.7839	5065.84	0.05868
-14.7426	5065.86	0.05935
-14.555	5063.72	0.0594
-14.3559	5061.37	0.05904
-14.3232	5060.97	0.05935
-13.9325	5060.56	0.05956
-13.9312	5059.02	0.05928
-13.767	5058.78	0.05967
-13.7675	5057.96	0.05992
-13.4534	5055.03	0.05932
-13.3273	5053.44	0.05896
-13.2501	5052.39	0.05912
-13.0756	5051.23	0.05909
-12.9878	5049.26	0.05898
-12.8999	5048.09	0.05951
-12.6987	5044.32	0.05925
-12.6461	5041.9	0.0592
-12.446	5038.55	0.0592
-12.3418	5035.84	0.05923
-12.1718	5032.19	0.0592
-12.0122	5028.97	0.05956
-12.0327	5024.34	0.05959
-11.7602	5019.91	0.05972
-11.6711	5014.89	0.0594
-11.4299	5011.38	0.0591
-11.3936	5008.76	0.05947
-11.2973	5004.85	0.05948
-11.0942	4999.97	0.05911
-10.9104	4997.37	0.05932
-10.8941	4993.87	0.05961
-10.6674	4989.77	0.0593
-10.5283	4987.27	0.05907
-10.3227	4984.51	0.05937
-10.2561	4981.53	0.05941
-10.0714	4979.14	0.05918
-9.88624	4977.99	0.05913
-9.85515	4975.04	0.05933
-9.67725	4972.19	0.05908
-9.53953	4970.34	0.05933
-9.46799	4969.32	0.05942
-9.25039	4966.09	0.05921
-9.16715	4963.94	0.05941
-8.93655	4961.5	0.05943
-8.7521	4959.38	0.05931
-8.66895	4956.78	0.05939
-8.56645	4954.89	0.05928
-8.42968	4953.05	0.05978
-8.22425	4949.52	0.05978
-8.05388	4946.41	0.05953
-7.95496	4943.94	0.05938
-7.73666	4940.71	0.05946
-7.60916	4937.56	0.05952
-7.44166	4934.62	0.05952
-7.30542	4930.85	0.05947
-7.18914	4929.16	0.05989
-6.98949	4925.8	0.05962
-6.85114	4923.08	0.05961
-6.78076	4919.93	0.05929
-6.57946	4918.47	0.05976
-6.42273	4915.86	0.05946
-6.29662	4913.88	0.05988
-6.21452	4909.77	0.05965
-6.01069	4907.35	0.05965
-5.86854	4904.41	0.05955
-5.65489	4901.44	0.05976
-5.5806	4897.64	0.05992
-5.4588	4894.15	0.06012
-5.30528	4889.97	0.05996
-5.16377	4886.16	0.05978
-5.04467	4883.13	0.05947
-4.82316	4880.46	0.05946
-4.7413	4878.2	0.05958
-4.58708	4875.31	0.05973
-4.41335	4872.78	0.05979
-4.20903	4871.43	0.05972
-4.08064	4869.78	0.06007
-4.00743	4867.9	0.05984
-3.81361	4867.05	0.05988
-3.62226	4865.66	0.05999
-3.48547	4864.14	0.05984
-3.3571	4863.39	0.05964
-3.18411	4863.13	0.06004
-3.07575	4861.99	0.05965
-2.92658	4862.63	0.05999
-2.78918	4863.05	0.05978
-2.59786	4863.77	0.06005
-2.46749	4863.53	0.06002
-2.28976	4862.75	0.05991
-2.16236	4863.23	0.05998
-2.05312	4863.71	0.06004
-1.85126	4863.16	0.05998
-1.7729	4862.32	0.06003
-1.58478	4862.85	0.06016
-1.42378	4862.59	0.05991
-1.20507	4861.8	0.06005
-1.11991	4860.88	0.06009
-0.98732	4858.95	0.06019
-0.7853	4856.65	0.06047
-0.67378	4855.84	0.0605
-0.51248	4853.46	0.06039
-0.33389	4852.23	0.06048
-0.19139	4851.1	0.06043
-0.00567	4849.86	0.06065
0.11513	4848.57	0.06053
0.24512	4846.97	0.06068
0.40823	4845.65	0.06067
0.56938	4842.99	0.06021
0.73483	4840.82	0.06043
0.90195	4837.28	0.06045
1.05905	4834.32	0.06029
1.16358	4831.64	0.06045
1.3462	4827.32	0.0604
1.55543	4823.99	0.05991
1.68368	4820.76	0.06025
1.82999	4817.56	0.06025
1.97931	4814.21	0.06011
2.11517	4810.58	0.06059
2.24578	4805.62	0.0603
2.48486	4802.16	0.06031
2.58497	4798.52	0.06046
2.77801	4795.78	0.06082
2.88277	4791.69	0.06054
3.04402	4788.1	0.06037
3.18974	4785.48	0.06046
3.39101	4782.55	0.06032
3.55478	4779.63	0.06013
3.60922	4777.69	0.06094
3.83213	4774.22	0.0605
3.93329	4771.96	0.06035
4.11615	4769.18	0.06057
4.27464	4766.73	0.06033
4.43	4763.12	0.0605
4.56407	4759.99	0.06049
4.72251	4757.9	0.06038
4.83117	4755.09	0.06061
5.07954	4751.81	0.0604
5.11779	4749.36	0.06051
5.32335	4746.01	0.06025
5.54452	4743.6	0.06016
5.52649	4741.76	0.06075
5.85422	4736.87	0.06019
5.9811	4734.27	0.0603
6.09718	4730.58	0.06029
6.3829	4727.55	0.06022
6.44365	4725.35	0.06088
6.62971	4720.69	0.06048
6.75739	4717.57	0.06073
6.89768	4713.56	0.06068
7.07619	4709.55	0.06084
7.22901	4705.97	0.0609
7.35692	4702.17	0.06086
7.4566	4699.64	0.06098
7.56114	4696.56	0.06066
7.77688	4695.4	0.06026
7.94746	4694.99	0.06027
8.0823	4694.66	0.06028
8.17736	4694.8	0.06077
8.3295	4693.82	0.06029
8.44693	4694.44	0.06052
8.62264	4694.14	0.06047
8.77009	4694.89	0.06047
8.91758	4695.7	0.06025
9.01447	4696.11	0.06048
9.17219	4695.58	0.06086
9.37021	4694.29	0.0605
9.45068	4693.59	0.06069
9.67646	4692.81	0.06059
9.72833	4692.58	0.06066
9.92877	4691.82	0.06081
10.0813	4690.26	0.06057
10.1724	4688.93	0.06048
10.3959	4688.84	0.06034
10.49	4687.5	0.06031
10.6117	4686.78	0.06074
10.8528	4685.46	0.06068
10.9363	4683.46	0.06039
11.0674	4682.19	0.06061
11.2384	4679.96	0.06031
11.41	4678.02	0.06023
11.5324	4675.87	0.06034
11.7295	4672.63	0.06032
11.8164	4669.62	0.0603
11.9716	4666.09	0.06011
12.1487	4663.51	0.0602
12.2642	4659.24	0.06019
12.4284	4656.6	0.06026
12.5773	4652.76	0.06003
12.7703	4649.69	0.06009
12.8435	4646.08	0.06043
13.0487	4642.96	0.06019
13.1723	4640.16	0.0603
13.337	4636.88	0.05987
13.4118	4633.73	0.05961
13.6214	4631.28	0.05976
13.7795	4628.64	0.05987
13.8931	4625.64	0.05968
14.0835	4623.57	0.06001
14.2273	4620.18	0.0598
14.3797	4618.01	0.05975
14.5607	4614.87	0.05951
14.6846	4612	0.05947
14.8779	4609.67	0.05964
15.0154	4606.18	0.05981
15.1388	4601.59	0.05962
15.3043	4598.42	0.0594
15.4186	4595.69	0.05946
15.6265	4592.64	0.05955
15.7662	4589.77	0.05961
15.8652	4585.98	0.0598
16.0621	4582.28	0.0595
16.204	4578.75	0.0594
16.3378	4575.1	0.05937
16.5124	4572.36	0.05925
16.6833	4568.92	0.05941
16.8444	4565.78	0.05932
16.939	4563.1	0.05925
17.1167	4561.68	0.05916
17.2898	4560.69	0.05893
17.3924	4559.63	0.05909
17.5586	4559.07	0.05895
17.6814	4558.88	0.05893
17.8665	4558.39	0.05914
18.0436	4557.93	0.05859
18.1566	4558.89	0.05885
18.3421	4558.69	0.05877
18.4326	4558.32	0.05879
18.5758	4557.62	0.0586
18.7918	4557.73	0.05864
18.8972	4557.16	0.0587
19.084	4555.77	0.05872
19.2205	4554.26	0.0586
19.3548	4554.19	0.05892
19.5047	4552.01	0.05863
19.6655	4550.8	0.05844
19.8066	4549.7	0.0583
19.9751	4548.96	0.05851
20.1222	4547.1	0.05837
20.3169	4544.85	0.05856
20.4272	4543.6	0.05864
20.5962	4540.25	0.0585
20.6952	4538.1	0.05854
20.8877	4535.03	0.05863
21.0248	4531.67	0.05854
21.141	4528.48	0.05867
21.3781	4524.75	0.05842
21.4662	4521.42	0.05825
21.6366	4518.46	0.05853
21.7708	4514.35	0.05818
21.946	4511.98	0.05841
22.095	4508.36	0.05829
22.2083	4505.16	0.05818
22.3887	4502.41	0.05813
22.5391	4499.36	0.05813
22.6579	4496.27	0.05791
22.8205	4494.04	0.05783
22.9842	4491.48	0.05803
23.1576	4489.29	0.05823
23.3044	4485.45	0.05785
23.415	4481.93	0.05744
23.6033	4480.4	0.05812
23.7129	4477.01	0.05825
23.9252	4472.62	0.05768
24.0327	4468.51	0.058
24.2469	4465.37	0.0576
24.3261	4461.6	0.05768
24.4657	4457.95	0.05801
24.6645	4454.91	0.05772
24.7449	4452.56	0.05783
24.9372	4450.46	0.05779
25.1029	4447.51	0.05743
25.2426	4445.85	0.05728
25.3919	4444.71	0.05731
25.5178	4444.04	0.05751
25.696	4442.57	0.0574
25.8944	4441.8	0.05757
25.9807	4440.78	0.05778
26.1783	4438.92	0.05737
26.3477	4438.36	0.05718
26.4704	4438.25	0.05732
26.5873	4437.64	0.05739
26.7681	4436.52	0.05711
26.9203	4436.89	0.05774
27.0583	4436.12	0.05719
27.198	4436.36	0.05786
27.3475	4434.34	0.05718
27.5295	4433.79	0.05712
27.6396	4432.8	0.05698
27.7953	4432.06	0.05723
27.971	4430.22	0.05772
28.0932	4427.38	0.05714
28.2383	4424.71	0.05687
28.4054	4422.89	0.0567
28.5395	4421.32	0.05717
28.6937	4418.37	0.057
28.802	4415.19	0.05669
28.9998	4412.92	0.05641
29.1308	4410.86	0.05671
29.2759	4408.22	0.05744
29.4263	4404.71	0.05724
29.6405	4400.73	0.0573
29.7131	4396.48	0.05684
29.909	4391.95	0.05619
30.0728	4390.34	0.05659
30.1738	4387.34	0.05678
30.3509	4383.9	0.05669
30.4857	4380.02	0.05626
30.6246	4377.82	0.05615
30.7893	4375.27	0.05623
30.9188	4372.65	0.05646
31.0718	4369.78	0.05679
31.2806	4365.72	0.05656
31.3686	4362.11	0.05635
31.519	4358.44	0.05657
31.681	4354.61	0.05591
31.834	4351.58	0.05572
31.9958	4349.4	0.05602
32.1334	4346.53	0.05595
32.2814	4344.26	0.05581
32.4088	4342.55	0.05615
32.5965	4340.1	0.05606
32.6951	4338.06	0.05571
32.8679	4337.14	0.05589
33.0299	4336.92	0.05615
33.1461	4335.18	0.05597
33.3287	4333.63	0.05577
33.4281	4332.56	0.05552
33.5988	4331.73	0.05511
33.7524	4332.42	0.0559
33.9523	4331.9	0.05605
34.0641	4331.34	0.05599
34.2495	4330.23	0.05577
34.3822	4329.99	0.05563
34.5424	4329.51	0.05587
34.6796	4327.08	0.05532
34.799	4326.42	0.0554
34.9627	4324.73	0.05535
35.1019	4322.87	0.05536
35.2649	4320.38	0.05527
35.4421	4318.77	0.05554
35.5629	4316.15	0.05553
35.7376	4314.4	0.0553
35.8205	4311.91	0.05566
36.0338	4308.93	0.05541
36.1149	4305.68	0.05496
36.3054	4303.55	0.05472
36.4849	4301.32	0.05537
36.6336	4297.71	0.05522
36.7227	4294.49	0.05512
36.8906	4291.06	0.05487
37.0593	4288.61	0.055
37.1713	4285.45	0.05495
37.3148	4282.02	0.05473
37.4832	4279	0.05477
37.6466	4276.59	0.05481
37.8125	4273.44	0.05494
37.9214	4269.89	0.05431
38.1144	4267.47	0.0546
38.2534	4264.78	0.05474
38.3776	4261.7	0.05454
38.5482	4258.18	0.05462
38.6903	4255.63	0.05476
38.8599	4253.39	0.05477
39	4250.38	0.05449
39.1444	4248.57	0.0543
39.313	4246.62	0.05418
39.4456	4244.59	0.05417
39.5808	4243.91	0.05429
39.7445	4242.27	0.05435
39.9035	4240.86	0.05461
40.0485	4238.76	0.05441
40.2109	4237.81	0.05419
40.3483	4236.25	0.05406
40.4971	4235.64	0.0542
40.6803	4233.98	0.05397
40.7896	4233.32	0.05396
40.9762	4233.11	0.05379
41.1301	4233.59	0.05418
41.2612	4233.28	0.05422
41.4095	4232.18	0.05394
41.544	4231.27	0.05372
41.7074	4229.94	0.05374
41.886	4228.41	0.05397
42.0539	4225.82	0.05405
42.165	4222.62	0.05404
42.3614	4219.85	0.05339
42.472	4218.44	0.05371
42.6538	4216.32	0.05344
42.7645	4214.73	0.05351
42.9374	4212.09	0.05325
43.044	4210.64	0.05363
43.2703	4207.34	0.0533
43.3514	4204.58	0.05353
43.5478	4201.15	0.05313
43.6959	4198.4	0.05326
43.8303	4195.36	0.05311
44.0224	4192.34	0.05304
44.1246	4189.75	0.05343
44.2619	4185.97	0.05305
44.449	4182.65	0.05278
44.5197	4179.95	0.05319
44.7619	4176.45	0.05287
44.8349	4173.64	0.05285
45.0239	4170.64	0.05255
45.1528	4168.06	0.05275
45.3069	4165.16	0.05283
45.4527	4162.47	0.05259
45.6182	4160.9	0.05282
45.7661	4159.95	0.05279
45.917	4157.77	0.05256
46.1156	4156.74	0.0528
46.2059	4155.57	0.05285
46.3922	4153.66	0.05275
46.4827	4151.2	0.05225
46.6998	4150.08	0.05258
46.8088	4148.08	0.05266
46.9978	4146.01	0.05236
47.1317	4143.95	0.05213
47.2675	4142.25	0.05179
47.4131	4142.09	0.05181
47.5914	4141.28	0.05196
47.7005	4140.94	0.0522
47.9013	4140.35	0.05187
47.9687	4140.11	0.05215
48.1564	4138.51	0.05179
48.3405	4137.49	0.0519
48.4456	4135.19	0.05227
48.6337	4132.25	0.05188
48.7663	4130.09	0.05193
48.9313	4128.31	0.0519
49.0954	4126.04	0.0517
49.1805	4124.51	0.05184
49.3542	4122.9	0.05165
49.5139	4121.34	0.05188
49.6616	4118.8	0.0517
49.8334	4116.15	0.05144
49.9412	4113.56	0.05172
50.1507	4110.39	0.05131
50.2492	4107.42	0.05134
50.3919	4104.23	0.0514
50.549	4101.47	0.05175
50.7128	4098.18	0.05154
50.8126	4095.27	0.05141
50.9857	4092.74	0.05135
51.1492	4089.69	0.05158
51.299	4086.59	0.05139
51.4967	4083.31	0.05136
51.6155	4079.13	0.05134
51.7766	4076.46	0.0511
51.9343	4074.51	0.05149
52.0813	4072.11	0.05102
52.2108	4070.17	0.05109
52.343	4068.39	0.05096
52.5402	4066.56	0.05081
52.6778	4064.71	0.05112
52.8229	4062.14	0.05086
52.964	4060.36	0.05081
53.1025	4058.61	0.05094
53.2833	4055.83	0.05093
53.3439	4054.66	0.05079
53.55	4052.71	0.05063
53.7051	4052.4	0.0506
53.8336	4052.3	0.05054
54.0093	4051.97	0.05045
54.1513	4051.07	0.05037
54.3033	4048.91	0.05031
54.4049	4046.28	0.05025
54.5974	4044.13	0.05041
54.7482	4041.36	0.05038
54.9145	4039.38	0.05034
55.0651	4037.7	0.05032
55.1912	4036.1	0.05019
55.3339	4033.85	0.05
55.5192	4031.85	0.04998
55.6218	4028.81	0.04983
55.789	4026.17	0.04972
55.9264	4024.01	0.04993
56.1193	4020.45	0.05001
56.2502	4017.29	0.05015
56.4196	4013.81	0.04997
56.5362	4009.84	0.04967
56.6604	4006.76	0.04944
56.8329	4004.34	0.04917
56.9425	4002.37	0.04965
57.1238	4000.33	0.04993
57.2987	3997.16	0.05018
57.4145	3994.1	0.05002
57.6123	3991.28	0.04975
57.7372	3989.46	0.0498
57.862	3987.73	0.04937
58.0479	3986.19	0.04926
58.182	3984.88	0.04949
58.3276	3983.48	0.04946
58.4751	3981.17	0.04938
58.6843	3979.11	0.04963
58.7636	3976.54	0.04947
58.9491	3973.53	0.04889
59.0562	3970.96	0.04875
59.2548	3969.36	0.04889
59.364	3968.26	0.04912
59.5324	3967.14	0.04914
59.6751	3966.56	0.04928
59.826	3965.94	0.04922
59.964	3965.53	0.04923
60.1027	3965.02	0.04924
60.3019	3963.82	0.0492
60.4033	3961.95	0.04923
60.5703	3959.42	0.04904
60.71	3956.89	0.04901
60.8524	3954.25	0.04901
61.0355	3952.06	0.04904
61.1796	3950.2	0.04897
61.3286	3948.81	0.04908
61.4822	3947.62	0.04896
61.6405	3946.26	0.04892
61.7705	3944.55	0.04882
61.9358	3942.48	0.0488
62.0916	3939.82	0.04873
62.239	3937.18	0.04872
62.4056	3934.02	0.04871
62.5572	3930.78	0.04882
62.6783	3927.3	0.04872
62.841	3924.11	0.04866
63.0037	3920.89	0.0486
63.103	3917.91	0.04859
63.3059	3914.77	0.04855
63.4477	3911.84	0.04867
63.5762	3908.68	0.04855
63.7541	3905.81	0.04847
63.8996	3903.73	0.04852
64.0525	3901.73	0.04845
64.1981	3900.4	0.04838
64.3642	3899.35	0.0484
64.4918	3898.15	0.0484
64.6583	3896.61	0.04835
64.8085	3894.37	0.0484
64.9523	3891.84	0.0484
65.1313	3889.17	0.04837
65.2663	3886.22	0.04839
65.4275	3883.38	0.04841
65.5646	3880.72	0.04825
65.7359	3879.26	0.0482
65.855	3877.96	0.04819
66.0276	3877.04	0.04805
66.1489	3875.96	0.04805
66.3285	3874.3	0.048
66.462	3871.83	0.04806
66.6307	3868.93	0.04806
66.7758	3866.13	0.04813
66.9239	3863.67	0.04805
67.0732	3861.76	0.04798
67.2317	3860.45	0.04795
67.365	3859.26	0.04801
67.5079	3857.66	0.04782
67.6864	3855.88	0.04788
67.8074	3853.28	0.04789
67.9938	3850.44	0.04795
68.1162	3846.92	0.04801
68.2913	3843.35	0.04794
68.4105	3839.61	0.04785
68.5789	3836.04	0.04777
68.7307	3832.95	0.04782
68.8742	3829.81	0.04784
69.0367	3826.49	0.04779
69.1767	3823.49	0.04786
69.3206	3820.77	0.04787
69.4705	3818.75	0.04777
69.6073	3817.2	0.04765
69.7737	3816.44	0.04766
69.9175	3815.46	0.04768
70.0632	3813.98	0.04767
70.2243	3812.02	0.0478
70.3566	3809.23	0.04771
70.5289	3806.26	0.04775
70.6628	3803	0.04775
70.8159	3799.71	0.04779
70.9402	3796.97	0.04768
71.1077	3794.99	0.04758
71.2546	3793.63	0.0476
71.4024	3792.39	0.0476
71.5473	3791.16	0.04755
71.7007	3788.87	0.0475
71.8414	3786.38	0.04754
71.9967	3783.48	0.04754
72.1589	3780.7	0.04756
72.3025	3778.33	0.04752
72.4539	3776.57	0.04753
72.6082	3775.49	0.04751
72.7511	3774.37	0.04752
72.9042	3772.88	0.04749
73.0435	3770.61	0.0475
73.2032	3768.07	0.04764
73.3484	3764.7	0.04761
73.4787	3760.95	0.04755
73.6388	3757.46	0.04753
73.8035	3753.88	0.04753
73.9338	3750.47	0.04763
74.1057	3747.25	0.04769
74.2498	3743.95	0.0476
74.402	3740.8	0.04749
74.5527	3738.61	0.04763
74.7038	3736.98	0.04767
74.8551	3735.54	0.04748
75.0089	3734.76	0.04757
75.1356	3733.78	0.04756
75.3014	3732.15	0.04753
75.4504	3729.82	0.0476
75.6029	3726.76	0.04765
75.7584	3723.24	0.04774
75.9036	3719.51	0.04772
76.0608	3716.2	0.04766
76.2007	3713.62	0.04764
76.3564	3711.87	0.04759
76.5116	3710.41	0.04767
76.6466	3708.72	0.04769
76.8102	3706.32	0.0476
76.9469	3703.54	0.04755
77.1021	3700.64	0.04751
77.2506	3697.97	0.04763
77.8574	3692.87	0.04783
78.0004	3691.16	0.04781
78.1473	3688.74	0.04775
78.3051	3685.72	0.04774
78.4478	3682.25	0.04777
78.6072	3678.61	0.04777
78.7445	3674.94	0.04779
78.9039	3671.55	0.04783
79.0129	3667.77	0.0477
79.213	3664.72	0.04772
79.3332	3661.89	0.04782
79.5024	3659.63	0.04781
79.6324	3658.04	0.04779
79.7921	3656.93	0.04784
79.945	3656.08	0.04785
80.094	3655.24	0.04791
80.2433	3653.43	0.04793
80.4016	3650.92	0.04796
80.5522	3647.56	0.04808
80.6939	3643.48	0.04805
80.841	3639.58	0.04799
80.9978	3636.43	0.04802
81.1406	3633.84	0.04798
81.2973	3631.88	0.04795
81.4513	3629.97	0.04802
81.5977	3627.74	0.04803
81.7434	3624.91	0.04802
81.8936	3621.79	0.04801
82.0476	3618.99	0.04799
82.1974	3616.73	0.04801
82.3389	3615.18	0.04806
82.4987	3614.16	0.0481
82.6463	3613.16	0.0481
82.7947	3611.81	0.04813
82.9464	3609.53	0.04818
83.0923	3606.61	0.0482
83.2448	3603.3	0.04825
83.395	3599.52	0.04828
83.545	3595.97	0.04832
83.6935	3592.28	0.04831
83.8366	3588.88	0.04832
83.9851	3585.82	0.04833
84.1368	3583.4	0.0484
84.2929	3581.56	0.04841
84.4316	3580.26	0.04844
84.5894	3579.32	0.04853
84.7399	3578.4	0.04854
84.8804	3577.06	0.04853
85.0428	3574.92	0.04862
85.1861	3571.59	0.04868
85.3383	3567.62	0.04876
85.4833	3563.27	0.0487
85.6398	3559.59	0.04871
85.791	3556.51	0.0488
85.938	3553.91	0.04875
86.094	3551.63	0.04882
86.2355	3549.07	0.04885
86.3857	3546.23	0.04879
86.5485	3543.33	0.04883
86.6858	3540.4	0.04883
86.8371	3537.98	0.04886
86.9928	3536.27	0.04889
87.1411	3535.2	0.04896
87.2849	3534.1	0.04891
87.4456	3532.81	0.04901
87.5921	3530.7	0.04907
87.7398	3527.67	0.04907
87.8876	3524.33	0.0491
88.0447	3520.61	0.04916
88.1902	3516.92	0.04927
88.3384	3513.18	0.04927
88.4929	3509.8	0.04935
88.633	3506.91	0.04936
88.7954	3504.84	0.04942
88.9369	3503.4	0.04947
89.0867	3502.21	0.04946
89.2352	3501.22	0.04944
89.3929	3500.22	0.04962
89.539	3498.34	0.04962
89.6862	3495.36	0.0497
89.8422	3491.33	0.04976
89.9875	3486.97	0.04988
90.1363	3482.83	0.04988
90.2867	3479.09	0.04985
90.4357	3475.96	0.04991
90.5891	3472.9	0.04979
90.7343	3469.9	0.04987
90.888	3466.98	0.04987
91.0392	3464.14	0.0499
91.1915	3461.33	0.04997
91.3397	3458.9	0.05003
91.487	3456.82	0.05007
91.6332	3455.5	0.0501
91.7793	3454.39	0.05012
91.9327	3453	0.05016
92.0885	3451	0.05023
92.2331	3448.05	0.05026
92.3902	3444.78	0.0504
92.538	3441.04	0.05048
92.6869	3437.13	0.05054
92.8354	3433.29	0.05054
92.9827	3429.87	0.05061
93.135	3427.18	0.05062
93.2868	3425.37	0.05072
93.4411	3424.07	0.05083
93.5834	3422.83	0.05075
93.7445	3421.79	0.05082
93.8836	3420.25	0.05084
94.0418	3417.82	0.05094
94.1928	3414.16	0.05101
94.3405	3409.7	0.05108
94.4844	3405.18	0.05121
94.6457	3401.02	0.05128
94.7873	3396.99	0.05125
94.9419	3393.4	0.05127
95.0856	3389.86	0.05138
95.2371	3386.43	0.05136
95.3893	3383.33	0.05134
95.5302	3380.47	0.05134
95.6848	3377.91	0.05147
95.8349	3375.74	0.05151
95.9851	3374.09	0.05153
96.1442	3372.76	0.05152
96.2899	3371.26	0.05155
96.4388	3369.22	0.05164
96.5922	3366.41	0.0518
96.7394	3362.99	0.0519
96.8925	3359.06	0.05204
97.0455	3354.85	0.05206
97.1856	3350.95	0.0521
97.3456	3347.62	0.05217
97.4932	3345.13	0.0522
97.6397	3343.4	0.05224
97.793	3342.06	0.05239
97.9429	3340.76	0.05243
98.096	3339.25	0.05255
98.2344	3337.08	0.05255
98.3882	3333.88	0.05262
98.5425	3329.71	0.05274
98.6932	3324.92	0.05287
98.8305	3320.11	0.05292
98.9932	3315.57	0.05301
99.1377	3311.12	0.05302
99.2849	3306.88	0.05316
99.4394	3302.8	0.05317
99.5876	3299.23	0.0531
99.739	3296.22	0.05318
99.895	3293.44	0.05332
100.036	3290.92	0.0534
100.185	3288.76	0.05345
100.336	3287.05	0.05345
100.49	3285.41	0.05355
100.636	3283.42	0.05367
100.79	3280.78	0.05375
100.937	3277.33	0.05386
101.087	3273.45	0.05395
101.244	3269.18	0.05411
101.385	3265.13	0.05424
101.545	3261.58	0.05429
101.687	3258.95	0.05436
101.84	3256.83	0.05442
101.994	3255.19	0.0546
102.137	3253.61	0.05467
102.295	3251.64	0.05483
102.437	3248.94	0.05494
102.588	3245.2	0.055
102.731	3240.6	0.05514
102.888	3235.57	0.05528
103.032	3230.39	0.05537
103.188	3225.2	0.05539
103.338	3220.11	0.0555
103.484	3215.07	0.0556
103.635	3210.66	0.05575
103.788	3206.98	0.05573
103.938	3203.99	0.0558
104.083	3201.2	0.05592
104.231	3198.51	0.05601
104.386	3196.12	0.05603
104.537	3193.89	0.05622
104.684	3191.71	0.05635
104.838	3189.11	0.05649
104.982	3186.11	0.0567
105.137	3182.27	0.05682
105.282	3177.9	0.05692
105.433	3173.44	0.057
105.585	3169.56	0.05708
105.738	3166.57	0.05723
105.884	3164.29	0.05742
106.036	3162.33	0.05758
106.187	3160.28	0.05776
106.329	3157.76	0.0579
106.481	3154.42	0.05803
106.637	3150.36	0.05819
106.78	3145.59	0.05826
106.934	3140.33	0.05844
107.084	3134.55	0.05855
107.234	3128.62	0.05879
107.387	3122.34	0.059
107.535	3116.65	0.05915
107.671	3111.7	0.0592
107.828	3107.67	0.05928
107.978	3104.32	0.05944
108.138	3101.01	0.05964
108.277	3097.93	0.05986
108.441	3094.92	0.05994
108.587	3092.11	0.06011
108.739	3089.34	0.06033
108.885	3086.24	0.06052
109.039	3082.43	0.06075
109.183	3077.8	0.06086
109.339	3073.06	0.06097
109.484	3068.89	0.06125
109.639	3065.59	0.06151
109.788	3062.7	0.06162
109.937	3060.32	0.06173
110.079	3057.98	0.06193
110.235	3054.92	0.06194
110.385	3051.23	0.06212
110.533	3046.94	0.06226
110.687	3042.22	0.0624
110.837	3036.94	0.06261
110.987	3031.01	0.06276
111.143	3024.56	0.06286
111.289	3018.07	0.063
111.436	3011.92	0.06307
111.592	3006.9	0.0632
111.737	3002.77	0.06322
111.886	2999.47	0.06329
112.036	2996.37	0.06346
112.197	2993.19	0.06368
112.34	2990.05	0.06376
112.488	2986.98	0.06384
112.641	2984.12	0.0639
112.794	2980.97	0.06404
112.934	2977.11	0.06421
113.089	2972.72	0.0643
113.24	2968.61	0.06448
113.384	2964.96	0.0646
113.535	2961.99	0.06482
113.692	2959.33	0.0649
113.836	2956.47	0.06499
113.988	2953.19	0.06515
114.14	2949.05	0.0653
114.287	2944.45	0.06539
114.438	2939.69	0.06559
114.591	2934.46	0.0657
114.735	2928.41	0.06578
114.882	2921.35	0.06577
115.034	2914.1	0.0658
115.187	2907.21	0.0659
115.339	2901.41	0.06621
115.487	2897.05	0.06634
115.636	2893.5	0.06627
115.78	2890.41	0.06627
115.935	2887.06	0.0663
116.083	2883.36	0.06644
116.239	2879.79	0.06653
116.385	2876.52	0.06663
116.528	2873.24	0.0667
116.686	2869.39	0.06668
116.841	2865	0.0669
116.983	2861.04	0.06718
117.133	2857.67	0.06727
117.283	2854.98	0.0673
117.434	2852.39	0.06732
117.585	2849.53	0.06736
117.728	2845.9	0.06729
117.884	2841.48	0.06734
118.036	2836.56	0.06748
118.189	2831.58	0.0677
118.334	2825.79	0.06763
118.486	2819.2	0.06775
118.638	2811.8	0.06791
118.79	2804.78	0.06812
118.943	2798.91	0.06815
119.085	2794.45	0.06807
119.238	2790.95	0.06803
119.379	2787.76	0.06793
119.536	2784.05	0.06805
119.684	2780.38	0.06815
119.834	2776.97	0.06822
119.979	2773.84	0.06818
120.136	2770.43	0.06824
120.284	2766.85	0.06845
120.43	2763.48	0.06848
120.583	2760.49	0.06857
120.737	2757.53	0.06871
120.883	2754.68	0.06884
121.033	2751.25	0.06894
121.186	2747.37	0.06911
121.326	2743.32	0.0691
121.482	2739.13	0.06907
121.637	2734.73	0.06914
121.785	2729.7	0.06926
121.935	2722.85	0.06953
122.088	2716.05	0.06967
122.233	2709.45	0.06964
122.386	2703.49	0.0696
122.535	2698.49	0.06958
122.684	2694.42	0.06952
122.827	2690.95	0.06946
122.991	2687.81	0.06947
123.136	2684.58	0.06952
123.281	2680.55	0.06966
123.436	2676.55	0.06994
123.584	2673.38	0.07002
123.736	2670.87	0.07004
123.886	2668.64	0.07003
124.023	2666.25	0.06994
124.185	2663.82	0.07005
124.336	2661	0.07018
124.486	2657.87	0.0703
124.633	2654.1	0.07035
124.785	2649.75	0.07053
124.933	2645.05	0.07077
125.088	2640.49	0.07081
125.226	2635.68	0.0708
125.382	2630.14	0.07077
125.534	2624.16	0.07077
125.695	2618.02	0.07084
125.836	2612.27	0.07086
125.986	2607.19	0.07085
126.138	2602.9	0.07087
126.284	2598.51	0.07103
126.43	2594.52	0.07127
126.579	2591.33	0.0713
126.736	2588.2	0.0713
126.882	2585.07	0.07131
127.034	2582.34	0.07131
127.173	2580.29	0.07132
127.335	2578.62	0.07139
127.486	2576.58	0.07142
127.629	2574.09	0.07149
127.786	2570.13	0.07195
127.927	2566.26	0.07201
128.079	2562.35	0.07199
128.229	2558.4	0.07197
128.381	2554.34	0.07201
128.524	2549.78	0.07201
128.699	2544.31	0.07212
128.826	2538.34	0.07224
128.989	2532.44	0.07225
129.124	2526.74	0.07226
129.293	2521.39	0.07229
129.433	2516.22	0.07243
129.584	2511.87	0.07241
129.738	2508.27	0.07238
129.885	2505.08	0.07233
130.027	2501.86	0.07237
130.191	2498.4	0.07249
130.335	2495.37	0.07253
130.474	2493.02	0.07257
130.632	2491.18	0.07274
130.78	2489.56	0.07281
130.938	2487.44	0.0729
131.075	2484.4	0.07298
131.227	2480.31	0.07313
131.386	2476.14	0.07324
131.527	2471.91	0.07337
131.688	2467.74	0.07341
131.822	2463.1	0.07346
131.971	2457.61	0.07362
132.12	2452.26	0.07361
132.275	2446.95	0.07364
132.418	2441.54	0.07383
132.585	2436.29	0.07387
132.732	2431.19	0.07403
132.878	2426.77	0.07401
133.028	2422.86	0.07398
133.176	2419.48	0.074
133.327	2416.18	0.07413
133.471	2413.15	0.07411
133.624	2410.48	0.0742
133.778	2408.52	0.07423
133.926	2407.09	0.07428
134.074	2405.47	0.07446
134.222	2403.22	0.07459
134.38	2399.72	0.07475
134.518	2395.67	0.07494
134.673	2391.4	0.07511
134.829	2387.2	0.07523
134.963	2382.72	0.07532
135.12	2377.71	0.07542
135.263	2372.43	0.07546
135.434	2367.5	0.07557
135.58	2362.62	0.07558
135.72	2357.56	0.07569
135.869	2352.74	0.07566
136.026	2347.74	0.07578
136.175	2343.18	0.07581
136.315	2339.09	0.07593
136.47	2335.5	0.07597
136.626	2332.37	0.07602
136.777	2329.57	0.07606
136.924	2327.26	0.07614
137.075	2325.44	0.07629
137.232	2324	0.07639
137.375	2322.42	0.07647
137.524	2319.58	0.07653
137.671	2315.55	0.07685
137.823	2310.9	0.07717
137.986	2306.46	0.07741
138.13	2301.83	0.07755
138.289	2296.71	0.07775
138.421	2291.84	0.07783
138.577	2287.24	0.07787
138.725	2283.07	0.07794
138.891	2278.86	0.07791
139.03	2274.57	0.07797
139.186	2270.04	0.07799
139.327	2265.51	0.07804
139.476	2261.41	0.0781
139.62	2257.9	0.07813
139.783	2254.9	0.0781
139.928	2252.59	0.07811
140.061	2250.68	0.07813
140.219	2249.09	0.07819
140.358	2247.46	0.07828
140.527	2245.67	0.07838
140.672	2242.94	0.07839
140.809	2239.37	0.07855
140.98	2235.43	0.07871
141.131	2231.04	0.07881
141.273	2226.09	0.07897
141.419	2221	0.0791
141.559	2216.14	0.07918
141.723	2211.54	0.07929
141.864	2207.2	0.07938
142.022	2203.01	0.07944
142.169	2198.53	0.07951
142.327	2193.82	0.07956
142.473	2189.14	0.07964
142.627	2184.82	0.07963
142.775	2181.15	0.0797
142.923	2178.21	0.07971
143.075	2175.99	0.07977
143.23	2174.08	0.07987
143.372	2172.3	0.07998
143.518	2170.39	0.08006
143.66	2167.96	0.08011
143.818	2164.98	0.08031
143.967	2161.5	0.08039
144.118	2157.58	0.08051
144.266	2152.94	0.08052
144.416	2148.1	0.08055
144.548	2143.44	0.08058
144.713	2139.05	0.08057
144.871	2134.86	0.08064
145.029	2130.79	0.08065
145.168	2126.46	0.08071
145.311	2121.7	0.08086
145.467	2116.68	0.08095
145.612	2111.89	0.08115
145.772	2107.64	0.08115
145.93	2104.51	0.08119
146.07	2102.39	0.08121
146.214	2100.67	0.08123
146.357	2098.64	0.08133
146.522	2096.28	0.08145
146.664	2093.61	0.08148
146.818	2090.78	0.08159
146.971	2087.5	0.08168
147.12	2083.38	0.08178
147.259	2078.58	0.08188
147.414	2073.65	0.08194
147.578	2069.04	0.08204
147.704	2064.9	0.08201
147.849	2060.94	0.0822
148.022	2056.86	0.08222
148.156	2052.74	0.08224
148.313	2048.34	0.08226
148.469	2043.6	0.08223
148.612	2039.08	0.08238
148.768	2035.16	0.08232
148.91	2032.32	0.08244
149.07	2030.15	0.08247
149.207	2028.2	0.08257
149.371	2025.78	0.08269
149.519	2022.86	0.08276
149.662	2020.04	0.08286
149.827	2017.05	0.08295
149.972	2013.37	0.08305
150.123	2008.92	0.08313
150.275	2004.21	0.08316
150.417	1999.76	0.08324
150.576	1995.67	0.08325
150.718	1991.82	0.08335
150.867	1987.81	0.08341
151.008	1983.69	0.08347
151.165	1979.46	0.08361
151.309	1974.95	0.08363
151.467	1970.56	0.08376
151.623	1966.81	0.0837
151.753	1963.97	0.08375
151.908	1961.8	0.08377
152.084	1959.78	0.08376
152.211	1957.3	0.08377
152.38	1954.48	0.08389
152.505	1951.62	0.08392
152.67	1948.56	0.08405
152.799	1944.84	0.08414
152.961	1940.61	0.08429
153.124	1936.14	0.08433
153.273	1931.95	0.08433
153.416	1928.07	0.08443
153.563	1924.24	0.08447
153.727	1920.33	0.08451
153.876	1916.44	0.08458
154.019	1912.42	0.08463
154.178	1908.18	0.08471
154.306	1904.07	0.08475
154.461	1900.43	0.0849
154.602	1897.4	0.08503
154.765	1894.82	0.08508
154.933	1892.35	0.08513
155.062	1889.68	0.08513
155.187	1886.88	0.08534
155.37	1883.83	0.08534
155.456	1880.38	0.08536
155.667	1876.32	0.08553
155.804	1872.07	0.08566
155.96	1867.89	0.08584
156.113	1864.01	0.08596
156.251	1860.33	0.08602
156.401	1856.73	0.08604
156.544	1853.05	0.08605
156.705	1849.27	0.08603
156.866	1845.51	0.0861
157.012	1841.85	0.08617
157.165	1838.33	0.08639
157.325	1835.09	0.08652
157.474	1832.2	0.08668
157.624	1829.54	0.0867
157.777	1827.21	0.0867
157.925	1824.69	0.08659
158.06	1821.83	0.08657
158.219	1818.65	0.08657
158.383	1815.28	0.08654
158.514	1811.49	0.08671
158.678	1807.12	0.08705
158.799	1802.74	0.08762
158.986	1798.88	0.08777
159.125	1795.71	0.08764
159.296	1792.76	0.08751
159.439	1789.75	0.08731
159.559	1786.83	0.08723
159.726	1784	0.08725
159.879	1781.06	0.0872
160.019	1777.91	0.08718
160.167	1774.52	0.0872
160.325	1770.7	0.08748
160.469	1766.3	0.08826
160.624	1762.72	0.08879
160.784	1759.66	0.0888
160.926	1757	0.08854
161.078	1754.66	0.0883
161.23	1752.27	0.08815
161.377	1749.32	0.08796
161.519	1745.94	0.08793
161.666	1742.23	0.08792
161.826	1737.66	0.08827
161.978	1732.68	0.08898
162.13	1728.83	0.08942
162.268	1726.33	0.08947
162.438	1724.22	0.08927
162.555	1721.74	0.08908
162.721	1718.77	0.08889
162.875	1715.77	0.08873
163.02	1712.96	0.0886
163.179	1709.42	0.08876
163.316	1704.12	0.08972
163.47	1700	0.09037
163.616	1697.4	0.09029
163.775	1695.54	0.09006
163.928	1693.37	0.08976
164.069	1690.6	0.08952
164.221	1687.53	0.08937
164.378	1684.07	0.08923
164.514	1680.27	0.08935
164.673	1675.51	0.09013
164.833	1671.71	0.09091
164.982	1669.5	0.09099
165.127	1667.35	0.0907
165.275	1664.71	0.09044
165.43	1661.97	0.09012
165.56	1659.31	0.0899
165.72	1656.52	0.08972
165.885	1653.48	0.08953
166.011	1650.46	0.0894
166.178	1647.63	0.08938
166.332	1643.55	0.08979
166.501	1637.97	0.09121
166.627	1634.26	0.09166
166.777	1631.38	0.09152
166.926	1628.82	0.09118
167.069	1626.6	0.09087
167.247	1624.64	0.0906
167.363	1622.71	0.09044
167.542	1620.3	0.0903
167.686	1617.15	0.09018
167.833	1613.63	0.09018
167.971	1609.9	0.09014
168.114	1605.78	0.09035
168.27	1599.61	0.09144
168.415	1594.61	0.09256
168.586	1591.38	0.09296
168.724	1589.37	0.09284
168.859	1587.86	0.09252
169.027	1586.08	0.09225
169.175	1583.73	0.09191
169.315	1581.07	0.09172
169.467	1578.67	0.09146
169.612	1576.51	0.09136
169.76	1574.17	0.0912
169.91	1571.37	0.09108
170.069	1568.07	0.09105
170.218	1563.46	0.09137
170.376	1556.47	0.09294
170.505	1551.58	0.09361
170.66	1548.42	0.09365
170.837	1546.38	0.09325
170.962	1544.73	0.09293
171.134	1542.88	0.09252
171.272	1540.97	0.09228
171.426	1538.76	0.09211
171.579	1536.02	0.09199
171.728	1533.21	0.09189
171.853	1530.68	0.09183
172.031	1528.18	0.0918
172.182	1525.24	0.09182
172.325	1519.12	0.09309
172.473	1513.4	0.09476
172.62	1509.69	0.09522
172.774	1506.46	0.0951
172.938	1503.64	0.0947
173.078	1501.51	0.09426
173.238	1499.74	0.09385
173.367	1497.91	0.09356
173.536	1495.75	0.09335
173.659	1493.47	0.09317
173.835	1491.02	0.09306
173.97	1488.39	0.09289
174.108	1485.81	0.0929
174.278	1483.26	0.09283
174.426	1480.67	0.09279
174.564	1477.71	0.09281
174.727	1474.55	0.09287
174.87	1470.81	0.09291
175.01	1462.88	0.09496
175.163	1457.69	0.0959
175.324	1454.62	0.09566
175.473	1452.56	0.09521
175.609	1450.74	0.09485
175.779	1448.75	0.09459
175.916	1446.52	0.0944
176.076	1444.35	0.0943
176.232	1442.22	0.09415
176.377	1440.04	0.09414
176.518	1437.71	0.09408
176.659	1434.99	0.09415
176.827	1431.93	0.09413
176.97	1428.77	0.09411
177.115	1425.34	0.09423
177.275	1421.41	0.09428
177.426	1411.37	0.09826
177.583	1408.84	0.09917
177.73	1407.94	0.09814
177.883	1407.01	0.09725
178.017	1405.71	0.09653
178.184	1403.92	0.09621
178.324	1402	0.0958
178.46	1400.32	0.09574
178.639	1398.42	0.09555
178.782	1396.11	0.09551
178.934	1393.37	0.09545
179.075	1390.51	0.09542
179.218	1387.45	0.0954
179.366	1383.99	0.09539
179.53	1380.38	0.09529
179.671	1376.78	0.09529
179.823	1373.3	0.09534
179.983	1370.06	0.09529
180.143	1367.23	0.09523
180.275	1364.53	0.09518
180.429	1361.88	0.09522
180.574	1359.66	0.09523
180.724	1357.62	0.09531
180.886	1355.17	0.09533
181.017	1352.26	0.09548
181.161	1349.13	0.09553
181.319	1345.88	0.09553
181.451	1342.3	0.09562
181.6	1338.02	0.09574
181.766	1330.12	0.09851
181.918	1326.21	0.09899
182.061	1323.65	0.09873
182.201	1321.6	0.09838
182.359	1319.76	0.09805
182.515	1318.1	0.09779
182.656	1316.63	0.09766
182.815	1315.21	0.09758
182.981	1313.36	0.09748
183.112	1310.88	0.0975
183.267	1308.1	0.09751
183.417	1305.01	0.09748
183.577	1301.76	0.09743
183.725	1298.65	0.09738
183.874	1295.62	0.09735
184.004	1292.41	0.09739
184.19	1289.07	0.09741
184.347	1285.99	0.09734
184.461	1283.18	0.09743
184.625	1265.49	0.10016
185.666	1285.27	0.10262
185.812	1283.33	0.10221
185.953	1280.87	0.10204
186.123	1277.92	0.1019
186.254	1274.62	0.10183
186.4	1271.34	0.10177
186.558	1268.18	0.10173
186.702	1265.1	0.10165
186.871	1261.82	0.10163
187.004	1258.45	0.10156
187.171	1255.28	0.10151
187.312	1252.81	0.10148
187.474	1250.76	0.10142
187.63	1248.63	0.10145
187.775	1246.25	0.10147
187.916	1243.71	0.10148
188.07	1240.63	0.10153
188.206	1237.12	0.10154
188.364	1233.72	0.1015
188.533	1230.56	0.10148
188.673	1227.45	0.10148
188.809	1224.25	0.10157
188.984	1220.79	0.10157
189.137	1217.57	0.10154
189.265	1215	0.10157
189.412	1212.81	0.10162
189.58	1210.43	0.10164
189.732	1207.89	0.10164
189.85	1205.3	0.1017
190.009	1202.15	0.10184
190.16	1198.72	0.10188
190.327	1195.47	0.10189
190.459	1192.4	0.10197
190.627	1189.27	0.102
190.764	1186.11	0.10205
190.922	1182.82	0.10211
191.07	1179.84	0.10214
191.235	1177.27	0.10217
191.375	1174.89	0.10221
191.533	1172.37	0.10231
191.683	1169.77	0.10235
191.831	1167.01	0.10242
191.989	1164.02	0.10246
192.122	1160.94	0.10254
192.255	1157.89	0.1027
192.432	1154.74	0.10268
192.578	1151.67	0.10271
192.731	1148.67	0.10275
192.873	1145.84	0.10282
193.023	1143.11	0.10292
193.19	1140.41	0.10296
193.329	1137.83	0.10298
193.472	1135.27	0.10308
193.624	1132.41	0.10317
193.767	1129.59	0.10321
193.914	1126.79	0.10335
194.081	1123.8	0.10336
194.212	1120.79	0.10347
194.356	1117.78	0.10356
194.5	1114.85	0.10363
194.668	1112.2	0.1037
194.807	1109.54	0.10375
194.967	1106.66	0.10386
195.125	1103.86	0.10392
195.271	1101.24	0.10397
195.401	1098.42	0.1041
195.573	1095.64	0.10416
195.702	1093.05	0.10422
195.843	1090.26	0.10436
196.016	1087.24	0.10447
196.155	1084.29	0.1045
196.328	1081.61	0.1046
196.464	1079.18	0.10465
196.635	1076.61	0.10481
196.762	1073.69	0.10485
196.923	1070.78	0.10503
197.059	1067.9	0.10505
197.221	1065.14	0.10515
197.384	1062.52	0.10515
197.517	1060.07	0.10525
197.668	1057.45	0.10538
197.831	1054.58	0.10541
197.958	1051.8	0.10558
198.123	1049.33	0.10564
198.267	1046.93	0.10572
198.419	1044.25	0.10581
198.577	1041.34	0.10593
198.729	1038.28	0.10602
198.869	1035.34	0.10611
199.011	1032.72	0.10619
199.168	1030.18	0.10624
199.313	1027.7	0.10637
199.48	1025.15	0.10643
199.617	1022.5	0.10654
199.757	1020.02	0.10667
199.925	1017.66	0.10678
200.068	1015.11	0.10684
200.221	1012.41	0.10699
200.363	1009.07	0.10646
200.511	1006.46	0.10767
200.671	1003.46	0.10717
200.824	1000.91	0.10727
200.989	998.354	0.10735
201.124	995.936	0.10746
201.279	993.542	0.10761
201.422	991.194	0.10774
201.559	988.815	0.1079
201.707	986.229	0.10802
201.862	983.537	0.10813
202.022	980.622	0.10819
202.179	977.548	0.10829
202.334	974.686	0.10836
202.461	972.132	0.10852
202.631	969.691	0.10861
202.756	967.245	0.1087
202.92	965.023	0.1088
203.074	962.915	0.10889
203.206	960.541	0.10905
203.359	957.948	0.10924
203.515	955.267	0.1093
203.655	952.403	0.10939
203.778	949.521	0.10956
203.958	946.602	0.10967
204.108	943.854	0.10966
204.268	941.414	0.10979
204.403	939.088	0.10987
204.562	937.016	0.11005
204.724	935.006	0.11012
204.837	932.639	0.11034
205.017	930.021	0.11048
205.154	927.26	0.11054
205.314	924.47	0.11067
205.438	921.797	0.11079
205.614	918.986	0.11094
205.77	916.232	0.11098
205.909	913.795	0.11113
206.068	911.68	0.11124
206.21	909.677	0.11136
206.368	907.571	0.11151
206.524	905.195	0.11163
206.679	902.551	0.11182
206.82	899.822	0.11189
206.945	897.227	0.11207
207.1	894.608	0.11221
207.264	891.862	0.11229
207.415	889.17	0.11239
207.552	886.899	0.11253
207.713	884.916	0.11262
207.865	882.789	0.11275
208.011	880.602	0.11288
208.132	878.127	0.11306
208.298	875.385	0.11325
208.455	872.786	0.1133
208.615	870.261	0.11342
208.772	867.729	0.11354
208.921	865.117	0.11368
209.072	862.732	0.11384
209.208	860.655	0.11398
209.373	858.539	0.11409
209.525	856.32	0.11419
209.644	853.997	0.1144
209.827	851.462	0.11451
209.954	848.962	0.11459
210.123	846.465	0.11478
210.262	843.985	0.11486
210.406	841.531	0.11501
210.542	839.171	0.11519
210.711	836.871	0.11528
210.855	834.669	0.11539
211.013	832.428	0.11549
211.139	830.067	0.11565
211.305	827.736	0.11579
211.454	825.313	0.11591
211.64	822.855	0.11603
211.788	820.459	0.11612
211.901	818.214	0.11633
212.066	815.996	0.1165
212.221	813.594	0.11659
212.375	811.27	0.1167
212.518	809	0.11682
212.673	806.665	0.11696
212.809	804.483	0.11706
212.965	802.203	0.1172
213.125	799.778	0.11732
213.278	797.457	0.11743
213.425	795.349	0.11756
213.574	793.176	0.1177
213.721	790.769	0.11786
213.867	788.31	0.11795
214.019	785.933	0.11806
214.163	783.705	0.11813
214.276	781.539	0.11831
214.449	779.272	0.1184
214.609	776.922	0.11848
214.772	774.764	0.11861
214.917	772.684	0.11871
215.031	770.437	0.11891
215.194	767.964	0.11905
215.347	765.367	0.11912
215.504	763.043	0.1192
215.657	760.884	0.11929
215.791	758.727	0.11944
215.945	756.592	0.11954
216.116	754.484	0.11965
216.251	752.385	0.11979
216.409	750.174	0.11992
216.558	747.874	0.12004
216.73	745.384	0.12013
216.846	742.942	0.12026
217.011	740.692	0.1204
217.18	738.558	0.12043
217.311	736.473	0.12058
217.483	734.558	0.12067
217.598	732.573	0.12084
217.767	730.348	0.12099
217.916	728.089	0.12105
218.068	725.717	0.12123
218.218	723.356	0.12127
218.365	721.007	0.12144
218.505	718.777	0.12152
218.677	716.707	0.12162
218.838	714.822	0.12168
218.979	712.972	0.12183
219.114	710.858	0.12197
219.263	708.593	0.1221
219.417	706.272	0.1222
219.563	704.038	0.12229
219.704	701.743	0.12242
219.871	699.413	0.12253
220.001	697.317	0.12259
220.153	695.454	0.12276
220.318	693.518	0.1228
220.468	691.535	0.12293
220.614	689.31	0.12303
220.759	687.049	0.12318
220.917	684.87	0.12326
221.058	682.691	0.12335
221.202	680.432	0.12348
221.366	678.293	0.12357
221.51	676.404	0.12367
221.658	674.456	0.12373
221.793	672.459	0.12392
221.961	670.312	0.12395
222.091	668.141	0.12407
222.239	665.991	0.1242
222.406	663.833	0.12427
222.549	661.71	0.12435
222.708	659.66	0.12445
222.849	657.644	0.12457
223.042	655.663	0.12462
223.177	653.658	0.1247
223.313	651.644	0.12484
223.469	649.628	0.12488
223.593	647.534	0.12504
223.759	645.418	0.1251
223.908	643.432	0.12516
224.033	641.489	0.12526
224.177	639.356	0.12538
224.342	637.242	0.1254
224.481	635.183	0.12546
224.642	633.183	0.12555
224.806	631.25	0.1256
224.954	629.229	0.12572
225.091	627.215	0.12585
225.258	625.331	0.12591
225.418	623.385	0.12598
225.557	621.332	0.12606
225.715	619.167	0.12613
225.847	617.157	0.12619
226.01	615.243	0.12625
226.172	613.346	0.12632
226.324	611.459	0.12641
226.451	609.605	0.1265
226.583	607.723	0.12662
226.758	605.736	0.12666
226.915	603.68	0.12669
227.054	601.551	0.12675
227.216	599.546	0.12683
227.359	597.668	0.12685
227.504	595.806	0.12695
227.661	594.058	0.12696
227.818	592.282	0.12706
227.971	590.363	0.12711
228.125	588.415	0.12716
228.263	586.411	0.12723
228.395	584.423	0.12729
228.561	582.405	0.12732
228.731	580.513	0.12733
228.851	578.785	0.12738
229.005	577.101	0.12748
229.164	575.33	0.12751
229.319	573.429	0.12755
229.467	571.463	0.12758
229.608	569.562	0.12763
229.77	567.658	0.12764
229.915	565.712	0.1277
230.08	563.871	0.12771
230.231	562.235	0.12773
230.357	560.538	0.12779
230.523	558.795	0.12782
230.663	556.928	0.12783
230.818	555.049	0.12787
230.958	553.215	0.12786
231.126	551.374	0.12787
231.281	549.557	0.12789
231.418	547.817	0.12791
231.55	546.105	0.12797
231.692	544.389	0.12798
231.859	542.594	0.12796
232.012	540.85	0.12793
232.169	539.068	0.12796
232.315	537.284	0.12794
232.449	535.539	0.12797
232.599	533.862	0.12796
232.78	532.098	0.12795
232.916	530.347	0.12797
233.084	528.606	0.12793
233.198	526.9	0.12799
233.378	525.183	0.12799
233.52	523.439	0.12799
233.647	521.452	0.12823
235.15	503.24	0.12808
235.297	501.596	0.12801
235.451	499.969	0.12788
235.589	498.356	0.1278
235.757	496.694	0.12769
235.916	495.029	0.12756
236.059	493.324	0.1275
236.218	491.58	0.12739
236.343	489.932	0.12728
236.498	488.344	0.1272
236.672	486.753	0.12703
236.796	485.192	0.12693
236.935	483.619	0.12688
237.12	482.034	0.12674
237.267	480.503	0.12661
237.418	478.976	0.12654
237.549	477.405	0.12644
237.71	475.819	0.12633
237.867	474.186	0.1262
238.003	472.538	0.12609
238.151	470.967	0.12598
238.302	469.463	0.12585
238.457	467.961	0.12569
238.596	466.471	0.1256
238.744	464.981	0.12542
238.896	463.485	0.12534
239.056	462.004	0.12518
239.21	460.532	0.1251
239.349	459.036	0.12498
239.483	457.521	0.12488
239.633	455.963	0.12476
239.789	454.357	0.12461
