# Supplementary material for: Overcoming the barrier: designing novel thermally robust shape memory vitrimers by establishing a new machine learning framework
Source: Royal Society of Chemistry journal article supplement (doi:10.1039/d3cp03631f), 2023-01-01
Supplement: d3cp03631f2.xlsx [file d3cp03631f2.xlsx]

## Sheet: Sheet1
Temperature	Heatflow
-49.8333	19.4224
-49.8333	19.4244
-49.6667	19.4265
-49.5	19.4284
-49.3333	19.4304
-49.1667	19.4324
-49	19.4345
-48.8333	19.4365
-48.6667	19.4385
-48.5	19.4405
-48.3333	19.4424
-48.1667	19.4443
-48	19.4462
-47.8333	19.4481
-47.6667	19.4498
-47.5	19.4515
-47.3333	19.4535
-47.1667	19.4553
-47	19.4572
-46.8333	19.4591
-46.6667	19.4612
-46.5	19.4634
-46.3333	19.4656
-46.1667	19.4677
-46	19.4699
-45.8333	19.4718
-45.6667	19.4734
-45.5	19.4748
-45.3333	19.4764
-45.1667	19.4781
-45	19.4798
-44.8333	19.4818
-44.6667	19.4838
-44.5	19.4858
-44.3333	19.4876
-44.1667	19.4895
-44	19.4912
-43.8333	19.493
-43.6667	19.4948
-43.5	19.4966
-43.3333	19.4984
-43.1667	19.5
-43	19.5016
-42.8333	19.503
-42.6667	19.5045
-42.5	19.5061
-42.3333	19.5077
-42.1667	19.5092
-42	19.5108
-41.8333	19.5123
-41.6667	19.5137
-41.5	19.5155
-41.3333	19.5174
-41.1667	19.5193
-41	19.5211
-40.8333	19.5229
-40.6667	19.5245
-40.5	19.5258
-40.3333	19.5272
-40.1667	19.5287
-40	19.5303
-39.8333	19.5319
-39.6667	19.5336
-39.5	19.5353
-39.3333	19.5371
-39.1667	19.5387
-39	19.5404
-38.8333	19.5421
-38.6667	19.5436
-38.5	19.5452
-38.3333	19.5467
-38.1667	19.5482
-38	19.5498
-37.8333	19.5514
-37.6667	19.553
-37.5	19.5545
-37.3333	19.5563
-37.1667	19.5579
-37	19.5594
-36.8333	19.5608
-36.6667	19.5622
-36.5	19.5634
-36.3333	19.5647
-36.1667	19.5662
-36	19.5676
-35.8333	19.569
-35.6667	19.5707
-35.5	19.5722
-35.3333	19.5734
-35.1667	19.5747
-35	19.576
-34.8333	19.577
-34.6667	19.5783
-34.5	19.5799
-34.3333	19.5813
-34.1667	19.5826
-34	19.584
-33.8333	19.5851
-33.6667	19.5865
-33.5	19.588
-33.3333	19.5894
-33.1667	19.5908
-33	19.5921
-32.8333	19.5933
-32.6667	19.5944
-32.5	19.5956
-32.3333	19.5971
-32.1667	19.5985
-32	19.6003
-31.8333	19.6019
-31.6667	19.6034
-31.5	19.6046
-31.3333	19.6058
-31.1667	19.6069
-31	19.6078
-30.8333	19.6087
-30.6667	19.6095
-30.5	19.6104
-30.3333	19.6115
-30.1667	19.6127
-30	19.6138
-29.8333	19.6149
-29.6667	19.6161
-29.5	19.6172
-29.3333	19.6184
-29.1667	19.62
-29	19.6216
-28.8333	19.6234
-28.6667	19.6255
-28.5	19.6272
-28.3333	19.6291
-28.1667	19.6305
-28	19.6306
-27.8333	19.6313
-27.6667	19.6321
-27.5	19.6333
-27.3333	19.6344
-27.1667	19.6354
-27	19.6363
-26.8333	19.6373
-26.6667	19.6385
-26.5	19.6398
-26.3333	19.641
-26.1667	19.6424
-26	19.6437
-25.8333	19.6449
-25.6667	19.6461
-25.5	19.6473
-25.3333	19.6484
-25.1667	19.6494
-25	19.6505
-24.8333	19.6517
-24.6667	19.6529
-24.5	19.6542
-24.3333	19.6554
-24.1667	19.6565
-24	19.6574
-23.8333	19.6583
-23.6667	19.6592
-23.5	19.6599
-23.3333	19.6607
-23.1667	19.6616
-23	19.6626
-22.8333	19.6635
-22.6667	19.6644
-22.5	19.6653
-22.3333	19.6662
-22.1667	19.6675
-22	19.6687
-21.8333	19.6701
-21.6667	19.6716
-21.5	19.673
-21.3333	19.6742
-21.1667	19.6754
-21	19.6763
-20.8333	19.6769
-20.6667	19.6774
-20.5	19.6777
-20.3333	19.6784
-20.1667	19.6792
-20	19.6811
-19.8333	19.6826
-19.6667	19.6839
-19.5	19.6849
-19.3333	19.6859
-19.1667	19.6868
-19	19.6877
-18.8333	19.6885
-18.6667	19.6893
-18.5	19.6902
-18.3333	19.6913
-18.1667	19.6923
-18	19.6931
-17.8333	19.6939
-17.6667	19.6951
-17.5	19.6958
-17.3333	19.6933
-17.1667	19.6884
-17	19.6819
-16.8333	19.6745
-16.6667	19.6683
-16.5	19.6701
-16.3333	19.678
-16.1667	19.6921
-16	19.7122
-15.8333	19.7422
-15.6667	19.7774
-15.5	19.8207
-15.3333	19.8738
-15.1667	19.9293
-15	19.9905
-14.8333	20.0566
-14.6667	20.1289
-14.5	20.206
-14.3333	20.2841
-14.1667	20.3639
-14	20.4445
-13.8333	20.5265
-13.6667	20.6083
-13.5	20.6903
-13.3333	20.7671
-13.1667	20.8398
-13	20.9112
-12.8333	20.98
-12.6667	21.0444
-12.5	21.1041
-12.3333	21.1582
-12.1667	21.2053
-12	21.2485
-11.8333	21.2858
-11.6667	21.3159
-11.5	21.3453
-11.3333	21.3677
-11.1667	21.3851
-11	21.4009
-10.8333	21.4096
-10.6667	21.4176
-10.5	21.4235
-10.3333	21.4276
-10.1667	21.4307
-10	21.4336
-9.83333	21.4358
-9.66667	21.4379
-9.5	21.4385
-9.33333	21.4395
-9.16667	21.4406
-9	21.4415
-8.83333	21.4422
-8.66667	21.4428
-8.5	21.4432
-8.33333	21.4438
-8.16667	21.4445
-8	21.4453
-7.83333	21.4472
-7.66667	21.4489
-7.5	21.4506
-7.33333	21.4526
-7.16667	21.4547
-7	21.4569
-6.83333	21.459
-6.66667	21.4613
-6.5	21.4637
-6.33333	21.4661
-6.16667	21.4684
-6	21.4707
-5.83333	21.4728
-5.66667	21.475
-5.5	21.477
-5.33333	21.4792
-5.16667	21.4815
-5	21.4839
-4.83333	21.4863
-4.66667	21.4886
-4.5	21.4909
-4.33333	21.4931
-4.16667	21.495
-4	21.4969
-3.83333	21.4988
-3.66667	21.5007
-3.5	21.5024
-3.33333	21.5041
-3.16667	21.5055
-3	21.5067
-2.83333	21.5079
-2.66667	21.5094
-2.5	21.5109
-2.33333	21.5126
-2.16667	21.5143
-2	21.5156
-1.83333	21.5169
-1.66667	21.5181
-1.5	21.5191
-1.33333	21.5204
-1.16667	21.5214
-1	21.5224
-0.83333	21.5234
-0.66667	21.5244
-0.5	21.5255
-0.33333	21.5265
-0.16667	21.5273
0	21.528
0.16667	21.5286
0.33333	21.5289
0.5	21.5292
0.66667	21.5298
0.83333	21.5305
1	21.5315
1.16667	21.5323
1.33333	21.5328
1.5	21.5335
1.66667	21.5342
1.83333	21.5349
2	21.5356
2.16667	21.5361
2.33333	21.5365
2.5	21.5369
2.66667	21.5374
2.83333	21.5378
3	21.5382
3.16667	21.5388
3.33333	21.5392
3.5	21.5395
3.66667	21.54
3.83333	21.5403
4	21.5405
4.16667	21.5407
4.33333	21.5409
4.5	21.5413
4.66667	21.5415
4.83333	21.5419
5	21.5424
5.16667	21.5428
5.33333	21.5429
5.5	21.543
5.66667	21.5432
5.83333	21.5433
6	21.5435
6.16667	21.5437
6.33333	21.5441
6.5	21.5445
6.66667	21.5449
6.83333	21.5455
7	21.5462
7.16667	21.5467
7.33333	21.5472
7.5	21.5476
7.66667	21.5477
7.83333	21.5479
8	21.548
8.16667	21.548
8.33333	21.5482
8.5	21.5483
8.66667	21.5483
8.83333	21.5483
9	21.5482
9.16667	21.5481
9.33333	21.5481
9.5	21.5481
9.66667	21.5481
9.83333	21.548
10	21.548
10.1667	21.5479
10.3333	21.5479
10.5	21.5478
10.6667	21.5479
10.8333	21.548
11	21.5481
11.1667	21.5483
11.3333	21.5486
11.5	21.5488
11.6667	21.5491
11.8333	21.5491
12	21.5491
12.1667	21.5492
12.3333	21.5492
12.5	21.5491
12.6667	21.5491
12.8333	21.5491
13	21.549
13.1667	21.5488
13.3333	21.5486
13.5	21.5485
13.6667	21.5482
13.8333	21.5479
14	21.5478
14.1667	21.5478
14.3333	21.5478
14.5	21.5478
14.6667	21.5477
14.8333	21.5476
15	21.5476
15.1667	21.5476
15.3333	21.5477
15.5	21.5477
15.6667	21.5477
15.8333	21.5476
16	21.5475
16.1667	21.5473
16.3333	21.5473
16.5	21.5472
16.6667	21.5472
16.8333	21.5472
17	21.5473
17.1667	21.5476
17.3333	21.5476
17.5	21.5476
17.6667	21.5476
17.8333	21.5478
18	21.5478
18.1667	21.5479
18.3333	21.5481
18.5	21.5483
18.6667	21.5489
18.8333	21.5499
19	21.5506
19.1667	21.552
19.3333	21.5535
19.5	21.5544
19.6667	21.5552
19.8333	21.5558
20	21.5558
20.1667	21.5557
20.3333	21.5556
20.5	21.5556
20.6667	21.5557
20.8333	21.5556
21	21.5556
21.1667	21.5556
21.3333	21.5555
21.5	21.5554
21.6667	21.5554
21.8333	21.5553
22	21.5552
22.1667	21.5549
22.3333	21.5547
22.5	21.5546
22.6667	21.5544
22.8333	21.5543
23	21.5543
23.1667	21.5543
23.3333	21.5544
23.5	21.5546
23.6667	21.5548
23.8333	21.5549
24	21.555
24.1667	21.5551
24.3333	21.5551
24.5	21.5552
24.6667	21.5552
24.8333	21.5551
25	21.5551
25.1667	21.555
25.3333	21.555
25.5	21.5551
25.6667	21.5552
25.8333	21.5553
26	21.5554
26.1667	21.5555
26.3333	21.5556
26.5	21.5556
26.6667	21.5557
26.8333	21.5559
27	21.5561
27.1667	21.5561
27.3333	21.5562
27.5	21.5564
27.6667	21.5563
27.8333	21.5562
28	21.5563
28.1667	21.5563
28.3333	21.5562
28.5	21.556
28.6667	21.5558
28.8333	21.5557
29	21.5555
29.1667	21.5553
29.3333	21.5552
29.5	21.5551
29.6667	21.555
29.8333	21.5549
30	21.5547
30.1667	21.5546
30.3333	21.5544
30.5	21.5542
30.6667	21.554
30.8333	21.5538
31	21.5537
31.1667	21.5536
31.3333	21.5535
31.5	21.5535
31.6667	21.5535
31.8333	21.5534
32	21.5533
32.1667	21.5533
32.3333	21.5533
32.5	21.5534
32.6667	21.5534
32.8333	21.5533
33	21.5532
33.1667	21.5532
33.3333	21.5532
33.5	21.5533
33.6667	21.5533
33.8333	21.5533
34	21.5534
34.1667	21.5536
34.3333	21.5536
34.5	21.5537
34.6667	21.5538
34.8333	21.5538
35	21.5537
35.1667	21.5536
35.3333	21.5535
35.5	21.5534
35.6667	21.5532
35.8333	21.5531
36	21.553
36.1667	21.5528
36.3333	21.5526
36.5	21.5525
36.6667	21.5524
36.8333	21.5523
37	21.5522
37.1667	21.5521
37.3333	21.552
37.5	21.5519
37.6667	21.5518
37.8333	21.5518
38	21.5518
38.1667	21.5519
38.3333	21.552
38.5	21.5521
38.6667	21.5522
38.8333	21.5523
39	21.5522
39.1667	21.5522
39.3333	21.5521
39.5	21.5521
39.6667	21.5521
39.8333	21.5522
40	21.5523
40.1667	21.5524
40.3333	21.5526
40.5	21.5526
40.6667	21.5527
40.8333	21.5527
41	21.5526
41.1667	21.5525
41.3333	21.5525
41.5	21.5525
41.6667	21.5524
41.8333	21.5523
42	21.5523
42.1667	21.5523
42.3333	21.5523
42.5	21.5523
42.6667	21.5522
42.8333	21.5522
43	21.5521
43.1667	21.552
43.3333	21.5519
43.5	21.5518
43.6667	21.5518
43.8333	21.5518
44	21.5518
44.1667	21.552
44.3333	21.5524
44.5	21.5527
44.6667	21.5529
44.8333	21.553
45	21.553
45.1667	21.553
45.3333	21.553
45.5	21.553
45.6667	21.553
45.8333	21.5529
46	21.5528
46.1667	21.5528
46.3333	21.553
46.5	21.5535
46.6667	21.5541
46.8333	21.5545
47	21.5547
47.1667	21.555
47.3333	21.5552
47.5	21.555
47.6667	21.5549
47.8333	21.5549
48	21.5547
48.1667	21.5546
48.3333	21.5546
48.5	21.5548
48.6667	21.5551
48.8333	21.5555
49	21.5557
49.1667	21.5561
49.3333	21.5564
49.5	21.5567
49.6667	21.557
49.8333	21.5572
50	21.5574
50.1667	21.5577
50.3333	21.558
50.5	21.5583
50.6667	21.5586
50.8333	21.5588
51	21.5589
51.1667	21.559
51.3333	21.5591
51.5	21.5592
51.6667	21.5593
51.8333	21.5593
52	21.5594
52.1667	21.5595
52.3333	21.5595
52.5	21.5595
52.6667	21.5596
52.8333	21.5597
53	21.56
53.1667	21.5602
53.3333	21.5608
53.5	21.5613
53.6667	21.5618
53.8333	21.5621
54	21.5623
54.1667	21.5625
54.3333	21.5627
54.5	21.563
54.6667	21.5632
54.8333	21.5635
55	21.5638
55.1667	21.5642
55.3333	21.5643
55.5	21.5644
55.6667	21.5646
55.8333	21.5648
56	21.5651
56.1667	21.5655
56.3333	21.566
56.5	21.5665
56.6667	21.5669
56.8333	21.567
57	21.5673
57.1667	21.5673
57.3333	21.5674
57.5	21.5675
57.6667	21.5677
57.8333	21.5679
58	21.5681
58.1667	21.5684
58.3333	21.5688
58.5	21.569
58.6667	21.5693
58.8333	21.5698
59	21.5702
59.1667	21.5707
59.3333	21.5711
59.5	21.5715
59.6667	21.5719
59.8333	21.5724
60	21.5728
60.1667	21.5732
60.3333	21.5736
60.5	21.5737
60.6667	21.5737
60.8333	21.5739
61	21.574
61.1667	21.5742
61.3333	21.5744
61.5	21.5749
61.6667	21.5752
61.8333	21.5758
62	21.5761
62.1667	21.5765
62.3333	21.5767
62.5	21.577
62.6667	21.5774
62.8333	21.5778
63	21.5783
63.1667	21.579
63.3333	21.5797
63.5	21.5804
63.6667	21.581
63.8333	21.5814
64	21.5818
64.1667	21.5821
64.3333	21.5822
64.5	21.5823
64.6667	21.5825
64.8333	21.5829
65	21.5833
65.1667	21.5837
65.3333	21.5843
65.5	21.5848
65.6667	21.5851
65.8333	21.5855
66	21.586
66.1667	21.5865
66.3333	21.5873
66.5	21.5881
66.6667	21.5886
66.8333	21.5889
67	21.5893
67.1667	21.5895
67.3333	21.5898
67.5	21.5901
67.6667	21.5905
67.8333	21.5908
68	21.5911
68.1667	21.5915
68.3333	21.5919
68.5	21.5924
68.6667	21.5929
68.8333	21.5932
69	21.5935
69.1667	21.5939
69.3333	21.5945
69.5	21.595
69.6667	21.5956
69.8333	21.5961
70	21.5965
70.1667	21.5966
70.3333	21.5967
70.5	21.597
70.6667	21.5973
70.8333	21.5976
71	21.598
71.1667	21.5986
71.3333	21.5991
71.5	21.5996
71.6667	21.6002
71.8333	21.6009
72	21.6015
72.1667	21.602
72.3333	21.6025
72.5	21.6029
72.6667	21.603
72.8333	21.6031
73	21.6033
73.1667	21.6036
73.3333	21.6039
73.5	21.6044
73.6667	21.6054
73.8333	21.6063
74	21.6068
74.1667	21.6075
74.3333	21.6083
74.5	21.6092
74.6667	21.61
74.8333	21.6108
75	21.6112
75.1667	21.6115
75.3333	21.6116
75.5	21.6118
75.6667	21.612
75.8333	21.6122
76	21.6128
76.1667	21.6132
76.3333	21.6134
76.5	21.614
76.6667	21.6146
76.8333	21.6152
77	21.6159
77.1667	21.6164
77.3333	21.6168
77.5	21.617
77.6667	21.6174
77.8333	21.6176
78	21.6179
78.1667	21.6184
78.3333	21.6192
78.5	21.6198
78.6667	21.6202
78.8333	21.6207
79	21.6209
79.1667	21.621
79.3333	21.6214
79.5	21.6217
79.6667	21.6226
79.8333	21.6234
80	21.6238
80.1667	21.6241
80.3333	21.6244
80.5	21.6249
80.6667	21.6257
80.8333	21.6265
81	21.6271
81.1667	21.6275
81.3333	21.6275
81.5	21.6276
81.6667	21.6276
81.8333	21.6276
82	21.6276
82.1667	21.6276
82.3333	21.6276
82.5	21.6276
82.6667	21.6278
82.8333	21.6279
83	21.6281
83.1667	21.6283
83.3333	21.6286
83.5	21.6289
83.6667	21.6295
83.8333	21.6302
84	21.631
84.1667	21.6317
84.3333	21.6323
84.5	21.6329
84.6667	21.6336
84.8333	21.6342
85	21.635
85.1667	21.6359
85.3333	21.6368
85.5	21.6376
85.6667	21.6383
85.8333	21.6389
86	21.6394
86.1667	21.6397
86.3333	21.6399
86.5	21.6401
86.6667	21.6403
86.8333	21.6406
87	21.6408
87.1667	21.6409
87.3333	21.6411
87.5	21.6415
87.6667	21.6418
87.8333	21.6422
88	21.6428
88.1667	21.6433
88.3333	21.6436
88.5	21.644
88.6667	21.6444
88.8333	21.6448
89	21.6453
89.1667	21.6459
89.3333	21.6465
89.5	21.6472
89.6667	21.6477
89.8333	21.648
90	21.6484
90.1667	21.6486
90.3333	21.6487
90.5	21.6489
90.6667	21.6492
90.8333	21.6495
91	21.6498
91.1667	21.6502
91.3333	21.6508
91.5	21.6514
91.6667	21.652
91.8333	21.6525
92	21.6529
92.1667	21.653
92.3333	21.6532
92.5	21.6534
92.6667	21.6538
92.8333	21.6544
93	21.6551
93.1667	21.6558
93.3333	21.6565
93.5	21.657
93.6667	21.6576
93.8333	21.6582
94	21.6586
94.1667	21.6591
94.3333	21.6593
94.5	21.6596
94.6667	21.6597
94.8333	21.6599
95	21.6602
95.1667	21.6605
95.3333	21.6609
95.5	21.6612
95.6667	21.6616
95.8333	21.662
96	21.6623
96.1667	21.6626
96.3333	21.663
96.5	21.6635
96.6667	21.6638
96.8333	21.6642
97	21.6643
97.1667	21.6645
97.3333	21.6647
97.5	21.6649
97.6667	21.6652
97.8333	21.6655
98	21.6658
98.1667	21.6661
98.3333	21.6665
98.5	21.6669
98.6667	21.6673
98.8333	21.6676
99	21.6679
99.1667	21.6682
99.3333	21.6684
99.5	21.6687
99.6667	21.669
99.8333	21.6695
100	21.67
100.167	21.6704
100.333	21.6709
100.5	21.6714
100.667	21.6719
100.833	21.6724
101	21.6729
101.167	21.6737
101.333	21.6743
101.5	21.6748
101.667	21.6753
101.833	21.676
102	21.6765
102.167	21.6771
102.333	21.6776
102.5	21.6781
102.667	21.6783
102.833	21.6785
103	21.6786
103.167	21.6787
103.333	21.6788
103.5	21.6789
103.667	21.679
103.833	21.6792
104	21.6796
104.167	21.68
104.333	21.6803
104.5	21.6807
104.667	21.6813
104.833	21.6816
105	21.6819
105.167	21.6822
105.333	21.6824
105.5	21.6825
105.667	21.6827
105.833	21.6829
106	21.6832
106.167	21.6835
106.333	21.6841
106.5	21.6847
106.667	21.6856
106.833	21.6863
107	21.6868
107.167	21.687
107.333	21.6872
107.5	21.6874
107.667	21.6876
107.833	21.6879
108	21.6888
108.167	21.6895
108.333	21.69
108.5	21.6903
108.667	21.6903
108.833	21.6904
109	21.6907
109.167	21.6911
109.333	21.6916
109.5	21.6923
109.667	21.693
109.833	21.6935
110	21.6938
110.167	21.6941
110.333	21.6944
110.5	21.6948
110.667	21.6951
110.833	21.6953
111	21.6955
111.167	21.6958
111.333	21.6961
111.5	21.6964
111.667	21.6969
111.833	21.6975
112	21.698
112.167	21.6987
112.333	21.6993
112.5	21.6999
112.667	21.7005
112.833	21.7011
113	21.7017
113.167	21.7021
113.333	21.7024
113.5	21.7027
113.667	21.7029
113.833	21.7031
114	21.7033
114.167	21.7035
114.333	21.7037
114.5	21.7041
114.667	21.7047
114.833	21.7052
115	21.7057
115.167	21.7062
115.333	21.7065
115.5	21.7067
115.667	21.7069
115.833	21.707
116	21.7071
116.167	21.7072
116.333	21.7074
116.5	21.7077
116.667	21.708
116.833	21.7083
117	21.7089
117.167	21.7094
117.333	21.7099
117.5	21.7108
117.667	21.7118
117.833	21.7129
118	21.7139
118.167	21.7144
118.333	21.7148
118.5	21.7149
118.667	21.7153
118.833	21.7158
119	21.7167
119.167	21.7178
119.333	21.7187
119.5	21.7195
119.667	21.7204
119.833	21.7213
120	21.7218
120.167	21.7222
120.333	21.7224
120.5	21.7225
120.667	21.7226
120.833	21.7231
121	21.7243
121.167	21.7249
121.333	21.7254
121.5	21.7258
121.667	21.7259
121.833	21.726
122	21.7261
122.167	21.7263
122.333	21.7265
122.5	21.727
122.667	21.7276
122.833	21.7282
123	21.7289
123.167	21.7297
123.333	21.7303
123.5	21.731
123.667	21.7316
123.833	21.732
124	21.7321
124.167	21.7324
124.333	21.7328
124.5	21.7333
124.667	21.7342
124.833	21.7349
125	21.7356
125.167	21.7361
125.333	21.7363
125.5	21.7366
125.667	21.737
125.833	21.7375
126	21.7382
126.167	21.7392
126.333	21.7404
126.5	21.7413
126.667	21.7422
126.833	21.7429
127	21.7434
127.167	21.7438
127.333	21.7442
127.5	21.7445
127.667	21.7449
127.833	21.7455
128	21.746
128.167	21.7464
128.333	21.7467
128.5	21.747
128.667	21.7472
128.833	21.7473
129	21.7476
129.167	21.748
129.333	21.7486
129.5	21.7495
129.667	21.7502
129.833	21.7507
130	21.751
130.167	21.7514
130.333	21.7517
130.5	21.7521
130.667	21.7524
130.833	21.7528
131	21.7533
131.167	21.7539
131.333	21.7544
131.5	21.7551
131.667	21.7557
131.833	21.7561
132	21.7565
132.167	21.7569
132.333	21.7571
132.5	21.7572
132.667	21.7574
132.833	21.7576
133	21.758
133.167	21.7584
133.333	21.7589
133.5	21.7595
133.667	21.7601
133.833	21.7606
134	21.7609
134.167	21.7611
134.333	21.7614
134.5	21.7617
134.667	21.7618
134.833	21.7621
135	21.7626
135.167	21.7631
135.333	21.7639
135.5	21.7648
135.667	21.7655
135.833	21.7663
136	21.7668
136.167	21.7673
136.333	21.7678
136.5	21.7683
136.667	21.7688
136.833	21.7692
137	21.7696
137.167	21.7699
137.333	21.7703
137.5	21.7706
137.667	21.7709
137.833	21.7714
138	21.772
138.167	21.7725
138.333	21.7729
138.5	21.7733
138.667	21.7736
138.833	21.7737
139	21.7739
139.167	21.7741
139.333	21.7744
139.5	21.7748
139.667	21.7754
139.833	21.7759
140	21.7763
140.167	21.7769
140.333	21.7772
140.5	21.7774
140.667	21.7775
140.833	21.7776
141	21.7778
141.167	21.778
141.333	21.7782
141.5	21.7787
141.667	21.7792
141.833	21.7798
142	21.7803
142.167	21.7807
142.333	21.7811
142.5	21.7816
142.667	21.782
142.833	21.7825
143	21.7833
143.167	21.7841
143.333	21.7848
143.5	21.7855
143.667	21.7861
143.833	21.7865
144	21.7869
144.167	21.7874
144.333	21.788
144.5	21.7886
144.667	21.7892
144.833	21.7897
145	21.79
145.167	21.7903
145.333	21.7906
145.5	21.791
145.667	21.7915
145.833	21.792
146	21.7925
146.167	21.7929
146.333	21.7932
146.5	21.7934
146.667	21.7939
146.833	21.7943
147	21.7948
147.167	21.7954
147.333	21.796
147.5	21.7963
147.667	21.7966
147.833	21.797
148	21.7973
148.167	21.7975
148.333	21.7979
148.5	21.7984
148.667	21.7989
148.833	21.7995
149	21.8001
149.167	21.8004
149.333	21.8006
149.5	21.8008
149.667	21.8008
149.833	21.8008
150	21.8008
150.167	21.8008
150.333	21.8007
150.5	21.8008
150.667	21.8012
150.833	21.8016
151	21.8022
151.167	21.803
151.333	21.8036
151.5	21.8042
151.667	21.8049
151.833	21.8054
152	21.8056
152.167	21.806
152.333	21.8065
152.5	21.807
152.667	21.8076
152.833	21.8086
153	21.8095
153.167	21.8101
153.333	21.8107
153.5	21.8111
153.667	21.8115
153.833	21.812
154	21.8126
154.167	21.8131
154.333	21.8134
154.5	21.8137
154.667	21.814
154.833	21.8144
155	21.8148
155.167	21.8152
155.333	21.8156
155.5	21.8161
155.667	21.8165
155.833	21.8171
156	21.8176
156.167	21.8181
156.333	21.8185
156.5	21.8189
156.667	21.8194
156.833	21.8199
157	21.8207
157.167	21.8215
157.333	21.8222
157.5	21.8228
157.667	21.8231
157.833	21.8233
158	21.8234
158.167	21.8235
158.333	21.8237
158.5	21.8239
158.667	21.8241
158.833	21.8245
159	21.8251
159.167	21.8257
159.333	21.8263
159.5	21.8271
159.667	21.8279
159.833	21.8285
160	21.8289
160.167	21.8292
160.333	21.8295
160.5	21.8297
160.667	21.83
160.833	21.8303
161	21.8307
161.167	21.8312
161.333	21.8316
161.5	21.832
161.667	21.8324
161.833	21.8328
162	21.8332
162.167	21.8335
162.333	21.8341
162.5	21.8346
162.667	21.8351
162.833	21.8358
163	21.8362
163.167	21.8367
163.333	21.8371
163.5	21.8375
163.667	21.8377
163.833	21.838
164	21.8383
164.167	21.8388
164.333	21.8393
164.5	21.8398
164.667	21.8403
164.833	21.8407
165	21.8409
165.167	21.8412
165.333	21.8415
165.5	21.8418
165.667	21.8423
165.833	21.8428
166	21.8434
166.167	21.8438
166.333	21.8441
166.5	21.8442
166.667	21.8443
166.833	21.8445
167	21.8446
167.167	21.8447
167.333	21.8448
167.5	21.845
167.667	21.8453
167.833	21.8459
168	21.8465
168.167	21.847
168.333	21.8474
168.5	21.8476
168.667	21.8478
168.833	21.8483
169	21.8485
169.167	21.8497
169.333	21.8506
169.5	21.8512
169.667	21.8514
169.833	21.8517
170	21.852
170.167	21.8524
170.333	21.8527
170.5	21.8531
170.667	21.8536
170.833	21.8543
171	21.8548
171.167	21.8555
171.333	21.8562
171.5	21.8568
171.667	21.8571
171.833	21.8573
172	21.8575
172.167	21.8579
172.333	21.8582
172.5	21.8586
172.667	21.8591
172.833	21.8595
173	21.8598
173.167	21.8602
173.333	21.8606
173.5	21.8611
173.667	21.8614
173.833	21.8618
174	21.8621
174.167	21.8623
174.333	21.8627
174.5	21.8631
174.667	21.8635
174.833	21.8639
175	21.8644
175.167	21.8648
175.333	21.8651
175.5	21.8654
175.667	21.8658
175.833	21.8661
176	21.8663
176.167	21.8667
176.333	21.8672
176.5	21.8679
176.667	21.8689
176.833	21.87
177	21.8709
177.167	21.8714
177.333	21.8721
177.5	21.8724
177.667	21.8727
177.833	21.8731
178	21.8736
178.167	21.8742
178.333	21.8747
178.5	21.8753
178.667	21.8759
178.833	21.8763
179	21.8767
179.167	21.8772
179.333	21.8777
179.5	21.878
179.667	21.8785
179.833	21.8789
180	21.8794
180.167	21.8799
180.333	21.8804
180.5	21.8809
180.667	21.8815
180.833	21.8819
181	21.8822
181.167	21.8824
181.333	21.8827
181.5	21.8831
181.667	21.8835
181.833	21.8839
182	21.8845
182.167	21.8848
182.333	21.885
182.5	21.8853
182.667	21.8856
182.833	21.886
183	21.8869
183.167	21.8882
183.333	21.8889
183.5	21.8895
183.667	21.89
183.833	21.8902
184	21.8904
184.167	21.8906
184.333	21.891
184.5	21.8914
184.667	21.8924
184.833	21.8939
185	21.8953
185.167	21.8965
185.333	21.8974
185.5	21.8983
185.667	21.8986
185.833	21.8988
186	21.8991
186.167	21.8994
186.333	21.8999
186.5	21.9006
186.667	21.9015
186.833	21.9022
187	21.9028
187.167	21.9032
187.333	21.9035
187.5	21.9036
187.667	21.9038
187.833	21.904
188	21.9043
188.167	21.9046
188.333	21.9048
188.5	21.9052
188.667	21.9058
188.833	21.9063
189	21.9069
189.167	21.9077
189.333	21.9085
189.5	21.9095
189.667	21.9105
189.833	21.9116
190	21.9126
190.167	21.9135
190.333	21.9145
190.5	21.9153
190.667	21.9161
190.833	21.9166
191	21.917
191.167	21.9172
191.333	21.9173
191.5	21.9175
191.667	21.9178
191.833	21.9181
192	21.9183
192.167	21.9184
192.333	21.9185
192.5	21.9186
192.667	21.9188
192.833	21.919
193	21.9191
193.167	21.9193
193.333	21.9193
193.5	21.9194
193.667	21.9196
193.833	21.9199
194	21.9203
194.167	21.9208
194.333	21.9213
194.5	21.9216
194.667	21.9219
194.833	21.9224
195	21.9228
195.167	21.9233
195.333	21.9238
195.5	21.9245
195.667	21.9251
195.833	21.9257
196	21.9261
196.167	21.9264
196.333	21.9267
196.5	21.9269
196.667	21.9271
196.833	21.9274
197	21.9278
197.167	21.9282
197.333	21.9289
197.5	21.9295
197.667	21.9301
197.833	21.9306
198	21.9309
198.167	21.9311
198.333	21.9312
198.5	21.9313
198.667	21.9315
198.833	21.9318
199	21.932
199.167	21.9322
199.333	21.9324
199.5	21.9327
199.667	21.9331
199.833	21.9335
200	21.934
200.167	21.9345
200.333	21.935
200.5	21.9354
200.667	21.9357
200.833	21.9359
201	21.9361
201.167	21.9363
201.333	21.9364
201.5	21.9365
201.667	21.9367
201.833	21.9369
202	21.9374
202.167	21.9381
202.333	21.9385
202.5	21.9389
202.667	21.9392
202.833	21.9396
203	21.94
203.167	21.9404
203.333	21.9409
203.5	21.9414
203.667	21.942
203.833	21.9427
204	21.9433
204.167	21.9439
204.333	21.9443
204.5	21.9448
204.667	21.9453
204.833	21.9457
205	21.9461
205.167	21.9465
205.333	21.9468
205.5	21.9471
205.667	21.9474
205.833	21.9477
206	21.948
206.167	21.9483
206.333	21.9486
206.5	21.949
206.667	21.9497
206.833	21.9503
207	21.951
207.167	21.9515
207.333	21.952
207.5	21.9524
207.667	21.9528
207.833	21.9531
208	21.9535
208.167	21.9538
208.333	21.9541
208.5	21.9546
208.667	21.955
208.833	21.9554
209	21.9557
209.167	21.9561
209.333	21.9565
209.5	21.9569
209.667	21.9573
209.833	21.9577
210	21.9581
210.167	21.9585
210.333	21.959
210.5	21.9595
210.667	21.9601
210.833	21.9607
211	21.9613
211.167	21.962
211.333	21.9628
211.5	21.9636
211.667	21.9642
211.833	21.9648
212	21.9654
212.167	21.9658
212.333	21.9662
212.5	21.9666
212.667	21.9671
212.833	21.9676
213	21.9682
213.167	21.9687
213.333	21.9692
213.5	21.9694
213.667	21.9697
213.833	21.97
214	21.9705
214.167	21.9702
214.333	21.9711
214.5	21.9722
214.667	21.9729
214.833	21.9737
215	21.9744
215.167	21.9751
215.333	21.9755
215.5	21.9759
215.667	21.9763
215.833	21.9767
216	21.9773
216.167	21.9781
216.333	21.9788
216.5	21.9797
216.667	21.9808
216.833	21.9818
217	21.983
217.167	21.9842
217.333	21.9854
217.5	21.9862
217.667	21.987
217.833	21.9875
218	21.9877
218.167	21.9879
218.333	21.9879
218.5	21.9876
218.667	21.9873
218.833	21.9872
219	21.9871
219.167	21.9872
219.333	21.9873
219.5	21.9878
219.667	21.9884
219.833	21.9889
220	21.9893
220.167	21.9897
220.333	21.9901
220.5	21.9906
220.667	21.9911
220.833	21.9918
221	21.9927
221.167	21.9937
221.333	21.9946
221.5	21.9953
221.667	21.9959
221.833	21.9963
222	21.9967
222.167	21.9971
222.333	21.9978
222.5	21.9987
222.667	21.9997
222.833	22.0005
223	22.0012
223.167	22.0017
223.333	22.002
223.5	22.0024
223.667	22.0028
223.833	22.0033
224	22.0039
224.167	22.0046
224.333	22.0054
224.5	22.0062
224.667	22.0068
224.833	22.0074
225	22.008
225.167	22.0084
225.333	22.0088
225.5	22.0095
225.667	22.0101
225.833	22.0107
226	22.0113
226.167	22.0119
226.333	22.0125
226.5	22.013
226.667	22.0136
226.833	22.0143
227	22.0148
227.167	22.0153
227.333	22.0158
227.5	22.0162
227.667	22.0165
227.833	22.0168
228	22.0173
228.167	22.0176
228.333	22.018
228.5	22.0184
228.667	22.0188
228.833	22.0191
229	22.0193
229.167	22.0197
229.333	22.02
229.5	22.0203
229.667	22.0206
229.833	22.021
230	22.0214
230.167	22.0218
230.333	22.0221
230.5	22.0224
230.667	22.0227
230.833	22.0231
231	22.0235
231.167	22.0238
231.333	22.0252
231.5	22.0271
231.667	22.0278
231.833	22.0285
232	22.0291
232.167	22.0294
232.333	22.0296
232.5	22.0298
232.667	22.0301
232.833	22.0305
233	22.0311
233.167	22.0316
233.333	22.0321
233.5	22.0324
233.667	22.0328
233.833	22.033
234	22.0332
234.167	22.0336
234.333	22.0342
234.5	22.0347
234.667	22.0348
234.833	22.0351
235	22.0354
235.167	22.0358
235.333	22.0364
235.5	22.037
235.667	22.0373
235.833	22.0375
236	22.0376
236.167	22.0379
236.333	22.0382
236.5	22.0384
236.667	22.0389
236.833	22.0396
237	22.0403
237.167	22.041
237.333	22.0415
237.5	22.0421
237.667	22.0427
237.833	22.0431
238	22.0435
238.167	22.0443
238.333	22.045
238.5	22.0461
238.667	22.0474
238.833	22.0483
239	22.049
239.167	22.0495
239.333	22.0501
239.5	22.0505
239.667	22.0509
239.833	22.0514
240	22.052
240.167	22.0526
240.333	22.0535
240.5	22.0546
240.667	22.0558
240.833	22.0569
241	22.0581
241.167	22.0592
241.333	22.0603
241.5	22.0613
241.667	22.0623
241.833	22.0632
242	22.064
242.167	22.0648
242.333	22.0654
242.5	22.0659
242.667	22.0663
242.833	22.0667
243	22.0672
243.167	22.0678
243.333	22.0685
243.5	22.0693
243.667	22.0701
243.833	22.0707
244	22.0711
244.167	22.0716
244.333	22.0719
244.5	22.0721
244.667	22.0723
244.833	22.0726
245	22.0729
245.167	22.0731
245.333	22.0733
245.5	22.0735
245.667	22.0737
245.833	22.074
246	22.0743
246.167	22.0748
246.333	22.0754
246.5	22.0761
246.667	22.0767
246.833	22.0775
247	22.0782
247.167	22.079
247.333	22.0796
247.5	22.08
247.667	22.0804
247.833	22.0808
248	22.0813
248.167	22.0817
248.333	22.0822
248.5	22.0828
248.667	22.0831
248.833	22.0835
249	22.0841
249.167	22.0846
249.333	22.085
249.5	22.0854
249.667	22.0858
249.833	22.0861
250	22.0865
250.167	22.0872
250.333	22.0879
250.5	22.0893
250.667	22.0903
250.833	22.0911
251	22.0915
251.167	22.092
251.333	22.0925
251.5	22.0931
251.667	22.0938
251.833	22.0945
252	22.0954
252.167	22.0964
252.333	22.0971
252.5	22.0979
252.667	22.0984
252.833	22.0988
253	22.0994
253.167	22.1002
253.333	22.101
253.5	22.1019
253.667	22.1028
253.833	22.1035
254	22.104
254.167	22.1046
254.333	22.1054
254.5	22.106
254.667	22.1067
254.833	22.1077
255	22.1087
255.167	22.1097
255.333	22.1108
255.5	22.1122
255.667	22.1134
255.833	22.1147
256	22.1159
256.167	22.1169
256.333	22.118
256.5	22.1189
256.667	22.1197
256.833	22.1206
257	22.1214
257.167	22.1221
257.333	22.1228
257.5	22.1237
257.667	22.1247
257.833	22.1257
258	22.1267
258.167	22.1275
258.333	22.1283
258.5	22.1291
258.667	22.1298
258.833	22.1308
259	22.1319
259.167	22.1331
259.333	22.1344
259.5	22.1354
259.667	22.1364
259.833	22.1374
260	22.1382
260.167	22.1389
260.333	22.1396
260.5	22.1402
260.667	22.1406
260.833	22.141
261	22.1416
261.167	22.1422
261.333	22.1427
261.5	22.1433
261.667	22.144
261.833	22.1446
262	22.1451
262.167	22.1455
262.333	22.1459
262.5	22.1462
262.667	22.1465
262.833	22.1467
263	22.147
263.167	22.1474
263.333	22.1476
263.5	22.1478
263.667	22.1481
263.833	22.1484
264	22.1488
264.167	22.1492
264.333	22.1498
264.5	22.1504
264.667	22.1511
264.833	22.1516
265	22.1521
265.167	22.1524
265.333	22.1527
265.5	22.153
265.667	22.1534
265.833	22.1537
266	22.1539
266.167	22.1542
266.333	22.1545
266.5	22.1548
266.667	22.155
266.833	22.1554
267	22.1558
267.167	22.1561
267.333	22.1565
267.5	22.1569
267.667	22.1574
267.833	22.1579
268	22.1585
268.167	22.159
268.333	22.1595
268.5	22.1599
268.667	22.1602
268.833	22.1606
269	22.161
269.167	22.1615
269.333	22.1622
269.5	22.1629
269.667	22.1636
269.833	22.1642
270	22.1647
270.167	22.1652
270.333	22.1658
270.5	22.1665
270.667	22.1673
270.833	22.168
271	22.1688
271.167	22.1697
271.333	22.1702
271.5	22.1711
271.667	22.172
271.833	22.1729
272	22.1739
272.167	22.1752
272.333	22.1762
272.5	22.177
272.667	22.1781
272.833	22.1789
273	22.1796
273.167	22.1805
273.333	22.1815
273.5	22.1822
273.667	22.183
273.833	22.1835
274	22.184
274.167	22.1844
274.333	22.1847
274.5	22.1852
274.667	22.1857
274.833	22.1864
275	22.1872
275.167	22.1878
275.333	22.1884
275.5	22.1888
275.667	22.1892
275.833	22.1897
276	22.1902
276.167	22.1909
276.333	22.1917
276.5	22.1928
276.667	22.194
276.833	22.1952
277	22.1964
277.167	22.1974
277.333	22.1983
277.5	22.1988
277.667	22.1993
277.833	22.1996
278	22.2001
278.167	22.2006
278.333	22.201
278.5	22.2026
278.667	22.2037
278.833	22.2048
279	22.2058
279.167	22.2067
279.333	22.2077
279.5	22.2083
279.667	22.2088
279.833	22.2092
280	22.2097
280.167	22.2101
280.333	22.2108
280.5	22.2117
280.667	22.2129
280.833	22.2138
281	22.2149
281.167	22.2166
281.333	22.2148
281.5	22.2151
281.667	22.2153
281.833	22.2158
282	22.2164
282.167	22.2174
282.333	22.2183
282.5	22.2191
282.667	22.22
282.833	22.2208
283	22.2217
[truncated: 582 more rows]
